# Supplementary material for: Transcriptional Enhancers in Protein-Coding Exons of Vertebrate Developmental Genes
Source: PLoS One. 2012 May 2;7(5):e35202. doi: 10.1371/journal.pone.0035202 (PMC3342275; doi:10.1371/journal.pone.0035202)
Supplement: Data File S1 — Data file of zebrafish-human exon conservation. ExonConservation_AllExonsInGene tab: The average of all exons in the gene is highlighted in yellow, the CCE tested in marked in red text. Exon-Cons,Total,Rank tab: a table of the average conservation, the CCE conservation, the exon rank of the CCE, and a count of exons in the gene. (XLS) [file pone.0035202.s014.xls]

## Sheet: ExonConservation_AllExonsInGene
The experimentally tested exons are marked in RED. The average of all exons in the gene is in the yellow filled line. Obtained from CDS Fasta records from UCSC Genome Browser, Zv8 and Hg19 genomes. *Note that these are CDS Fasta Records, and non-aligned or non-conserved exons are not present.
CCE_name	Zebrafish Zv8 Info	Human Hg19 Info	MATCH	GAP	MISMATCH	LENGTH	CONSERVATION
	>NM_130968_danRer6_1_27_199_0_1_chr1:39950249-39950447-	>NM_130968_hg19_1_27_199_0_1_chr4:183468649-183468760+	68	88	42	110	0.618182
CCE18-odz3	>NM_130968_danRer6_2_27_229_1_2_chr1:39927860-39928088-	>NM_130968_hg19_2_27_229_1_2_chr4:183522077-183522314+	167	6	55	222	0.752252
	>NM_130968_danRer6_3_27_239_2_1_chr1:39908522-39908760-	>NM_130968_hg19_3_27_239_2_1_chr4:183549804-183550042+	166	0	72	238	0.697479
	>NM_130968_danRer6_5_27_206_1_0_chr1:39867338-39867543-	>NM_130968_hg19_5_27_206_1_0_chr4:183594178-183594372+;chr11:78567211-78567223-	143	3	59	202	0.707921
	>NM_130968_danRer6_6_27_211_0_1_chr1:39863588-39863798-	>NM_130968_hg19_6_27_211_0_1_chr4:183600819-183601029+	148	0	62	210	0.704762
	>NM_130968_danRer6_7_27_102_1_1_chr1:39853704-39853805-	>NM_130968_hg19_7_27_102_1_1_chr4:183601401-183601502+	69	0	32	101	0.683168
	>NM_130968_danRer6_8_27_195_1_1_chr1:39851212-39851406-	>NM_130968_hg19_8_27_195_1_1_chr4:183601696-183601890+	148	0	46	194	0.762887
	>NM_130968_danRer6_9_27_201_1_1_chr1:39847657-39847857-	>NM_130968_hg19_9_27_201_1_1_chr4:183602967-183603167+	155	0	45	200	0.775
	>NM_130968_danRer6_10_27_186_1_1_chr1:39842756-39842941-	>NM_130968_hg19_10_27_186_1_1_chr4:183609319-183609504+	139	0	46	185	0.751351
	>NM_130968_danRer6_11_27_147_1_1_chr1:39826593-39826739-	>NM_130968_hg19_11_27_147_1_1_chr4:183635240-183635386+	123	0	23	146	0.842466
	>NM_130968_danRer6_12_27_217_1_2_chr1:39823426-39823642-	>NM_130968_hg19_12_27_217_1_2_chr4:183650118-183650334+	145	8	63	208	0.697115
	>NM_130968_danRer6_13_27_120_2_2_chr1:39815653-39815772-	>NM_130968_hg19_13_27_120_2_2_chr4:183651353-183651472+	86	0	33	119	0.722689
	>NM_130968_danRer6_14_27_262_2_0_chr1:39812536-39812797-	>NM_130968_hg19_14_27_262_2_0_chr4:183652031-183652292+	196	0	65	261	0.750958
	>NM_130968_danRer6_15_27_268_0_1_chr1:39808920-39809187-	>NM_130968_hg19_15_27_268_0_1_chr4:183657961-183658228+	193	0	74	267	0.722846
	>NM_130968_danRer6_16_27_144_1_1_chr1:39806734-39806877-	>NM_130968_hg19_16_27_144_1_1_chr4:183659554-183659697+	113	0	30	143	0.79
	>NM_130968_danRer6_17_27_250_1_2_chr1:39792450-39792699-	>NM_130968_hg19_17_27_250_1_2_chr4:183664323-183664572+	189	0	60	249	0.759036
	>NM_130968_danRer6_18_27_233_2_1_chr1:39784313-39784545-	>NM_130968_hg19_18_27_233_2_1_chr4:183672953-183673185+	160	2	70	230	0.695652
	>NM_130968_danRer6_19_27_155_1_0_chr1:39783695-39783849-	>NM_130968_hg19_19_27_155_1_0_chr4:183674603-183674757+	117	0	37	154	0.75974
	>NM_130968_danRer6_20_27_875_0_2_chr1:39780140-39781014-	>NM_130968_hg19_20_27_875_0_2_chr4:183675538-183676412+	619	0	255	874	0.708238
	>NM_130968_danRer6_21_27_176_2_1_chr1:39777805-39777980-	>NM_130968_hg19_21_27_176_2_1_chr4:183694625-183694800+	134	0	41	175	0.765714
	>NM_130968_danRer6_22_27_236_1_0_chr1:39776724-39776959-	>NM_130968_hg19_22_27_236_1_0_chr4:183696071-183696306+	177	0	58	235	0.753191
	>NM_130968_danRer6_23_27_297_0_0_chr1:39776003-39776299-	>NM_130968_hg19_23_27_297_0_0_chr4:183710246-183710542+	216	0	80	296	0.72973
	>NM_130968_danRer6_24_27_56_0_2_chr1:39774403-39774458-	>NM_130968_hg19_24_27_56_0_2_chr4:183713427-183713482+	41	0	14	55	0.745455
	>NM_130968_danRer6_25_27_1544_2_1_chr1:39772847-39774390-	>NM_130968_hg19_25_27_1544_2_1_chr4:183713495-183715038+	1183	0	360	1543	0.766688
	>NM_130968_danRer6_26_27_131_1_0_chr1:39772591-39772721-	>NM_130968_hg19_26_27_131_1_0_chr4:183717790-183717920+	98	0	32	130	0.753846
	>NM_130968_danRer6_27_27_759_0_0_chr1:39771551-39772309-	>NM_130968_hg19_27_27_759_0_0_chr4:183720749-183721504+	555	3	200	755	0.735099
						AVERAGE	0.736595
	>NM_001145689_danRer6_1_49_66_0_0_chr1:55915437-55915502-	>NM_001145689_hg19_1_49_66_0_0_chr19:1041361-1041426+	44	0	21	65	0.676923
	>NM_001145689_danRer6_2_49_94_0_1_chr1:55913357-55913450-	>NM_001145689_hg19_2_49_94_0_1_chr9:107651383-107651476-	65	0	28	93	0.698925
	>NM_001145689_danRer6_3_49_142_1_2_chr1:55910193-55910334-	>NM_001145689_hg19_3_49_142_1_2_chr9:107646708-107646849-	116	0	25	141	0.822695
	>NM_001145689_danRer6_4_49_119_2_1_chr1:55909472-55909590-	>NM_001145689_hg19_4_49_119_2_1_chr9:107645325-107645438-	64	9	45	109	0.587156
	>NM_001145689_danRer6_8_49_244_0_1_chr1:55886607-55886850-	>NM_001145689_hg19_8_49_244_0_1_chr9:107602560-107602800-	167	6	70	237	0.704641
	>NM_001145689_danRer6_9_49_140_1_0_chr1:55886005-55886144-	>NM_001145689_hg19_9_49_140_1_0_chr9:107599709-107599848-	106	0	33	139	0.76259
	>NM_001145689_danRer6_10_49_117_0_0_chr1:55884566-55884682-	>NM_001145689_hg19_10_49_117_0_0_chr9:107599261-107599377-	91	0	25	116	0.784483
	>NM_001145689_danRer6_11_49_195_0_0_chr1:55883628-55883822-	>NM_001145689_hg19_11_49_195_0_0_chr9:107594855-107595052-	116	0	78	194	0.597938
	>NM_001145689_danRer6_12_49_206_0_2_chr1:55880162-55880367-	>NM_001145689_hg19_12_49_206_0_2_chr9:107593903-107594108-	140	1	64	204	0.686275
	>NM_001145689_danRer6_13_49_177_2_2_chr1:55879588-55879764-	>NM_001145689_hg19_13_49_177_2_2_chr9:107593206-107593382-	142	0	34	176	0.806818
CCE9-abca1a	>NM_001145689_danRer6_14_49_223_2_0_chr1:55879087-55879309-	>NM_001145689_hg19_14_49_223_2_0_chr9:107591197-107591419-	182	0	40	222	0.81982
	>NM_001145689_danRer6_15_49_222_0_0_chr1:55878320-55878541-	>NM_001145689_hg19_15_49_222_0_0_chr9:107589229-107589450-	168	0	53	221	0.760181
	>NM_001145689_danRer6_16_49_205_0_1_chr1:55877241-55877445-	>NM_001145689_hg19_16_49_205_0_1_chr9:107587964-107588168-	150	0	54	204	0.735294
	>NM_001145689_danRer6_17_49_114_1_1_chr1:55877036-55877149-	>NM_001145689_hg19_17_49_114_1_1_chr9:107586746-107586859-	64	8	41	105	0.609524
	>NM_001145689_danRer6_18_49_172_1_2_chr1:55875868-55876039-	>NM_001145689_hg19_18_49_172_1_2_chr9:107584777-107584949-	121	1	49	170	0.711765
	>NM_001145689_danRer6_19_49_132_2_2_chr1:55875402-55875533-	>NM_001145689_hg19_19_49_132_2_2_chr9:107583656-107583787-	104	0	27	131	0.793893
	>NM_001145689_danRer6_20_49_140_2_1_chr1:55874846-55874985-	>NM_001145689_hg19_20_49_140_2_1_chr9:107582208-107582350-	93	0	46	139	0.669065
	>NM_001145689_danRer6_21_49_138_1_1_chr1:55873910-55874047-	>NM_001145689_hg19_21_49_138_1_1_chr9:107581867-107582004-	111	0	26	137	0.810219
	>NM_001145689_danRer6_22_49_233_1_0_chr1:55872759-55872991-	>NM_001145689_hg19_22_49_233_1_0_chr9:107580948-107581164-	167	16	49	216	0.773148
	>NM_001145689_danRer6_23_49_73_0_1_chr1:55871919-55871991-	>NM_001145689_hg19_23_49_73_0_1_chr9:107579613-107579685-	59	0	13	72	0.819444
	>NM_001145689_danRer6_24_49_203_1_0_chr1:55870866-55871068-	>NM_001145689_hg19_24_49_203_1_0_chr9:107578424-107578626-	146	0	56	202	0.722772
	>NM_001145689_danRer6_25_49_49_0_1_chr1:55869551-55869599-	>NM_001145689_hg19_25_49_49_0_1_chr9:107576708-107576756-	38	0	10	48	0.791667
	>NM_001145689_danRer6_26_49_114_1_1_chr1:55869341-55869454-	>NM_001145689_hg19_26_49_114_1_1_chr9:107576399-107576512-	70	3	40	110	0.636364
	>NM_001145689_danRer6_27_49_149_1_0_chr1:55869011-55869159-	>NM_001145689_hg19_27_49_149_1_0_chr9:107574855-107575003-	100	0	48	148	0.675676
	>NM_001145689_danRer6_28_49_125_0_2_chr1:55868141-55868265-	>NM_001145689_hg19_28_49_125_0_2_chr9:107573081-107573205-	92	0	32	124	0.741935
	>NM_001145689_danRer6_29_49_99_2_2_chr1:55867947-55868045-	>NM_001145689_hg19_29_49_99_2_2_chr9:107572834-107572941-	39	10	49	88	0.443182
	>NM_001145689_danRer6_30_49_190_2_0_chr1:55866992-55867181-	>NM_001145689_hg19_30_49_190_2_0_chr9:107568522-107568711-	117	0	72	189	0.619048
	>NM_001145689_danRer6_31_49_95_0_2_chr1:55866811-55866905-	>NM_001145689_hg19_31_49_95_0_2_chr9:107566907-107567001-	63	6	25	88	0.715909
	>NM_001145689_danRer6_32_49_33_2_2_chr1:55866687-55866719-	>NM_001145689_hg19_32_49_33_2_2_chr9:107565565-107565597-	26	0	6	32	0.8125
	>NM_001145689_danRer6_33_49_106_2_0_chr1:55865747-55865852-	>NM_001145689_hg19_33_49_106_2_0_chr9:107564335-107564440-	62	0	43	105	0.590476
	>NM_001145689_danRer6_35_49_170_0_2_chr1:55864979-55865148-	>NM_001145689_hg19_35_49_170_0_2_chr9:107562100-107562269-	116	0	53	169	0.686391
	>NM_001145689_danRer6_36_49_178_2_0_chr1:55864529-55864706-	>NM_001145689_hg19_36_49_178_2_0_chr9:107560702-107560879-	146	0	31	177	0.824859
	>NM_001145689_danRer6_37_49_116_0_2_chr1:55864332-55864447-	>NM_001145689_hg19_37_49_116_0_2_chr9:107558590-107558705-	89	0	26	115	0.773913
	>NM_001145689_danRer6_38_49_145_2_0_chr1:55863760-55863904-	>NM_001145689_hg19_38_49_145_2_0_chr9:107558334-107558478-	113	0	31	144	0.784722
	>NM_001145689_danRer6_39_49_127_0_1_chr1:55862882-55863008-	>NM_001145689_hg19_39_49_127_0_1_chr9:107556665-107556791-	96	0	30	126	0.761905
	>NM_001145689_danRer6_40_49_127_1_2_chr1:55862341-55862467-	>NM_001145689_hg19_40_49_127_1_2_chr9:107555452-107555578-	89	0	37	126	0.706349
	>NM_001145689_danRer6_41_49_121_2_0_chr1:55862017-55862137-	>NM_001145689_hg19_41_49_121_2_0_chr19:1058840-1058939+	64	20	36	100	0.64
	>NM_001145689_danRer6_42_49_63_0_0_chr1:55861184-55861246-	>NM_001145689_hg19_42_49_63_0_0_chr9:107554217-107554279-	48	0	14	62	0.774194
	>NM_001145689_danRer6_43_49_107_0_2_chr1:55860916-55861022-	>NM_001145689_hg19_43_49_107_0_2_chr9:107553203-107553309-	71	0	35	106	0.669811
	>NM_001145689_danRer6_44_49_142_2_0_chr1:55860569-55860710-	>NM_001145689_hg19_44_49_142_2_0_chr9:107550707-107550848-	108	0	33	141	0.765957
	>NM_001145689_danRer6_45_49_135_0_0_chr1:55860329-55860463-	>NM_001145689_hg19_45_49_135_0_0_chr9:107550201-107550335-	95	0	39	134	0.708955
	>NM_001145689_danRer6_46_49_104_0_2_chr1:55857238-55857341-	>NM_001145689_hg19_46_49_104_0_2_chr9:107549154-107549257-	75	0	28	103	0.728155
	>NM_001145689_danRer6_47_49_93_2_2_chr1:55856855-55856947-	>NM_001145689_hg19_47_49_93_2_2_chr9:107548579-107548671-	77	0	15	92	0.836957
	>NM_001145689_danRer6_48_49_244_2_0_chr1:55854978-55855221-	>NM_001145689_hg19_48_49_244_2_0_chr9:107547677-107547920-	167	0	76	243	0.687243
	>NM_001145689_danRer6_49_49_141_0_0_chr1:55853014-55853154-	>NM_001145689_hg19_49_49_141_0_0_chr9:107546596-107546736-	96	0	44	140	0.685714
						AVERAGE	0.720343
	>NM_131097_danRer6_3_16_285_0_0_chr2:7305281-7305565-	>NM_131097_hg19_3_16_285_0_0_chr3:184290292-184290574+	206	2	76	282	0.730496
	>NM_131097_danRer6_4_16_388_0_1_chr2:7301351-7301738-	>NM_131097_hg19_4_16_388_0_1_chr3:184290577-184290964+	290	0	97	387	0.749354
	>NM_131097_danRer6_5_16_156_1_1_chr2:7292588-7292743-	>NM_131097_hg19_5_16_156_1_1_chr3:184293618-184293773+	100	0	55	155	0.645161
	>NM_131097_danRer6_6_16_336_1_1_chr2:7289609-7289944-	>NM_131097_hg19_6_16_336_1_1_chr3:184294630-184294971+	218	0	117	335	0.650746
	>NM_131097_danRer6_7_16_125_1_0_chr2:7285510-7285634-	>NM_131097_hg19_7_16_125_1_0_chr3:184295131-184295255+	85	0	39	124	0.685484
	>NM_131097_danRer6_8_16_157_0_1_chr2:7284978-7285134-	>NM_131097_hg19_8_16_157_0_1_chr3:184295446-184295593+	83	9	64	147	0.564626
	>NM_131097_danRer6_9_16_109_1_2_chr2:7274918-7275026-	>NM_131097_hg19_9_16_109_1_2_chr3:184295704-184295794+	66	17	25	91	0.725275
	>NM_131097_danRer6_10_16_53_2_1_chr2:7269256-7269308-	>NM_131097_hg19_10_16_53_2_1_chr3:184296202-184296254+	36	0	16	52	0.692308
	>NM_131097_danRer6_11_16_123_1_1_chr2:7266848-7266970-	>NM_131097_hg19_11_16_123_1_1_chr3:184297265-184297387+	92	0	30	122	0.754098
	>NM_131097_danRer6_12_16_248_1_0_chr2:7264763-7265010-	>NM_131097_hg19_12_16_248_1_0_chr3:184297475-184297722+	183	0	64	247	0.740891
CCE2-ephb3a	>NM_131097_danRer6_13_16_216_0_0_chr2:7253727-7253942-	>NM_131097_hg19_13_16_216_0_0_chr3:184298190-184298405+	171	0	44	215	0.795349
	>NM_131097_danRer6_14_16_150_0_0_chr2:7247075-7247224-	>NM_131097_hg19_14_16_150_0_0_chr3:184298517-184298666+	116	0	33	149	0.778523
	>NM_131097_danRer6_15_16_194_0_2_chr2:7244121-7244314-	>NM_131097_hg19_15_16_194_0_2_chr3:184298760-184298953+	147	0	46	193	0.761658
	>NM_131097_danRer6_16_16_109_2_0_chr2:7235005-7235113-	>NM_131097_hg19_16_16_109_2_0_chr1:23239955-23240063+	55	0	53	108	0.509259
						AVERAGE	0.698802
	>NM_212612_danRer6_1_13_41_0_2_chr3:22242276-22242316-	>NM_212612_hg19_1_13_41_0_2_chr17:62502194-62502237-	33	0	7	40	0.825
	>NM_212612_danRer6_2_13_175_2_0_chr3:22241263-22241437-	>NM_212612_hg19_2_13_175_2_0_chr17:62500795-62500962-	111	9	54	165	0.672727
	>NM_212612_danRer6_3_13_97_0_1_chr3:22240652-22240748-	>NM_212612_hg19_3_13_97_0_1_chr17:62500340-62500436-	69	0	27	96	0.71875
	>NM_212612_danRer6_4_13_134_1_0_chr3:22240439-22240572-	>NM_212612_hg19_4_13_134_1_0_chr17:62500101-62500234-	103	0	30	133	0.774436
	>NM_212612_danRer6_5_13_66_0_0_chr3:22240282-22240347-	>NM_212612_hg19_5_13_66_0_0_chr17:62499921-62499986-	49	0	16	65	0.753846
	>NM_212612_danRer6_6_13_142_0_1_chr3:22240057-22240198-	>NM_212612_hg19_6_13_142_0_1_chr17:62499548-62499689-	102	0	39	141	0.723404
	>NM_212612_danRer6_7_13_161_1_0_chr3:22239810-22239970-	>NM_212612_hg19_7_13_161_1_0_chr17:62499306-62499466-	122	0	38	160	0.7625
	>NM_212612_danRer6_8_13_173_0_2_chr3:22239554-22239726-	>NM_212612_hg19_8_13_173_0_2_chr17:62499044-62499216-	129	0	43	172	0.75
	>NM_212612_danRer6_9_13_111_2_2_chr3:22239353-22239463-	>NM_212612_hg19_9_13_111_2_2_chr17:62498557-62498667-	85	0	25	110	0.772727
	>NM_212612_danRer6_10_13_62_2_1_chr3:22239195-22239256-	>NM_212612_hg19_10_13_62_2_1_chr17:62498280-62498341-	48	0	13	61	0.786885
	>NM_212612_danRer6_11_13_60_1_1_chr3:22239052-22239111-	>NM_212612_hg19_11_13_60_1_1_chr17:62498128-62498187-	48	0	11	59	0.813559
CCE51-ddx5	>NM_212612_danRer6_12_13_222_1_1_chr3:22237982-22238203-	>NM_212612_hg19_12_13_222_1_1_chr17:62496667-62496891-	166	0	55	221	0.751131
	>NM_212612_danRer6_13_13_112_1_2_chr3:22237731-22237842-	>NM_212612_hg19_13_13_112_1_2_chr17:62496330-62496444-	63	6	42	105	0.6
						AVERAGE	0.746536
CCE_L-rab40c	>NM_001040348_danRer6_1_6_142_0_1_chr3:24056994-24057135-	>NM_001040348_hg19_1_6_142_0_1_chr16:640292-640433+	120	0	21	141	0.851064
	>NM_001040348_danRer6_2_6_61_1_2_chr3:24044601-24044661-	>NM_001040348_hg19_2_6_61_1_2_chr16:667208-667268+	48	0	12	60	0.8
	>NM_001040348_danRer6_3_6_61_2_0_chr3:24037816-24037876-	>NM_001040348_hg19_3_6_61_2_0_chr16:668200-668260+	51	0	9	60	0.85
	>NM_001040348_danRer6_4_6_78_0_0_chr3:24036825-24036902-	>NM_001040348_hg19_4_6_78_0_0_chr16:675432-675509+	69	0	8	77	0.896104
	>NM_001040348_danRer6_5_6_223_0_1_chr3:24028642-24028864-	>NM_001040348_hg19_5_6_223_0_1_chr16:675899-676121+	183	0	39	222	0.824324
	>NM_001040348_danRer6_6_6_275_1_0_chr3:24024133-24024407-	>NM_001040348_hg19_6_6_275_1_0_chr16:677342-677622+	220	0	54	274	0.80292
	>NM_001002533_danRer6_2_3_88_0_1_chr3:33332398-33332485-	>NM_001002533_hg19_2_3_88_0_1_chr17:29758831-29758918+	63	0	24	87	0.724138
						AVERAGE	0.821221
	>NM_130962_danRer6_1_6_28_0_1_chr5:39716682-39716709-	>NM_130962_hg19_1_6_28_0_1_chr5:50679506-50679533+	25	0	2	27	0.925926
	>NM_130962_danRer6_2_6_190_1_2_chr5:39715920-39716109-	>NM_130962_hg19_2_6_190_1_2_chr5:50680375-50680564+	151	0	38	189	0.798942
	>NM_130962_danRer6_3_6_260_2_1_chr5:39714993-39715252-	>NM_130962_hg19_3_6_260_2_1_chr5:50683324-50683583+	201	0	58	259	0.776062
	>NM_130962_danRer6_4_6_287_1_0_chr5:39713289-39713575-	>NM_130962_hg19_4_6_287_1_0_chr5:50685480-50685766+	227	0	59	286	0.793706
CCE_M-isl1	>NM_130962_danRer6_5_6_168_0_0_chr5:39712787-39712954-	>NM_130962_hg19_5_6_168_0_0_chr5:50687108-50687275+	144	0	23	167	0.862275
	>NM_130962_danRer6_6_6_117_0_0_chr5:39712530-39712646-	>NM_130962_hg19_6_6_117_0_0_chr5:50689328-50689444+	95	0	21	116	0.818966
						AVERAGE	0.829313
	>NM_001039637_danRer6_1_16_156_0_0_chr6:47792410-47792565-	>NM_001039637_hg19_1_16_156_0_0_chr3:71247359-71247532-	99	4	52	151	0.655629
	>NM_001039637_danRer6_2_16_96_0_0_chr6:47739233-47739328-	>NM_001039637_hg19_2_16_96_0_0_chr3:71161687-71161788-	63	0	32	95	0.663158
	>NM_001039637_danRer6_3_16_138_0_0_chr6:47700035-47700172-	>NM_001039637_hg19_3_16_138_0_0_chr3:71102787-71102924-	109	0	28	137	0.79562
	>NM_001039637_danRer6_4_16_90_0_0_chr6:47697938-47698027-	>NM_001039637_hg19_4_16_90_0_0_chr3:71101688-71101774-	58	3	28	86	0.674419
	>NM_001039637_danRer6_5_16_142_0_1_chr6:47692378-47692519-	>NM_001039637_hg19_5_16_142_0_1_chr3:71096093-71096237-	107	0	34	141	0.758865
	>NM_001039637_danRer6_6_16_193_1_2_chr6:47683299-47683491-	>NM_001039637_hg19_6_16_193_1_2_chr3:71090479-71090683-	116	12	64	180	0.644444
	>NM_001039637_danRer6_7_16_108_2_2_chr6:47673838-47673945-	>NM_001039637_hg19_7_16_108_2_2_chr3:71064700-71064804-	78	3	26	104	0.75
	>NM_001039637_danRer6_8_16_88_2_0_chr6:47664743-47664830-	>NM_001039637_hg19_8_16_88_2_0_chr3:71050123-71050210-	63	0	24	87	0.724138
	>NM_001039637_danRer6_9_16_84_0_0_chr6:47661723-47661806-	>NM_001039637_hg19_9_16_84_0_0_chr3:71037145-71037228-	71	0	12	83	0.855422
	>NM_001039637_danRer6_10_16_205_0_1_chr6:47653665-47653869-	>NM_001039637_hg19_10_16_205_0_1_chr3:71026979-71027180-	151	3	50	201	0.751244
	>NM_001039637_danRer6_11_16_77_1_0_chr6:47653009-47653085-	>NM_001039637_hg19_11_16_77_1_0_chr3:71026794-71026870-	56	0	20	76	0.736842
	>NM_001039637_danRer6_12_16_102_0_0_chr6:47651568-47651669-	>NM_001039637_hg19_12_16_102_0_0_chr3:71026092-71026193-	86	0	15	101	0.851485
CCE_C-foxp1b	>NM_001039637_danRer6_13_16_122_0_2_chr6:47647616-47647737-	>NM_001039637_hg19_13_16_122_0_2_chr3:71021706-71021827-	104	0	17	121	0.859504
	>NM_001039637_danRer6_14_16_70_2_0_chr6:47645993-47646062-	>NM_001039637_hg19_14_16_70_2_0_chr3:71019887-71019956-	41	0	28	69	0.594203
	>NM_001039637_danRer6_15_16_164_0_2_chr6:47645145-47645308-	>NM_001039637_hg19_15_16_164_0_2_chr3:71015041-71015207-	124	0	39	163	0.760736
	>NM_001039637_danRer6_16_16_145_2_0_chr6:47639096-47639240-	>NM_001039637_hg19_16_16_145_2_0_chr3:71008398-71008542-	111	0	33	144	0.770833
						AVERAGE	0.740409
	>NM_131205_danRer6_1_11_48_0_0_chr6:15415757-15415804+	>NM_131205_hg19_1_11_48_0_0_chr3:185823613-185823657-	36	3	8	44	0.818182
	>NM_131205_danRer6_2_11_88_0_1_chr6:15415939-15416026+	>NM_131205_hg19_2_11_88_0_1_chr3:185823414-185823501-	57	3	27	84	0.678571
	>NM_131205_danRer6_3_11_48_1_1_chr6:15416141-15416188+	>NM_131205_hg19_3_11_48_1_1_chr3:185823238-185823285-	36	0	11	47	0.765957
	>NM_131205_danRer6_4_11_51_1_1_chr6:15416904-15416954+	>NM_131205_hg19_4_11_51_1_1_chr3:185823094-185823134-	36	9	5	41	0.878049
	>NM_131205_danRer6_7_11_290_0_2_chr6:15419339-15419628+	>NM_131205_hg19_7_11_290_0_2_chr3:185783602-185783861-	151	47	91	242	0.623967
	>NM_131205_danRer6_8_11_63_0_0_chr6:15420392-15420454+	>NM_131205_hg19_8_11_63_0_0_chr3:185782206-185782265-	36	3	23	59	0.610169
	>NM_131205_danRer6_9_11_239_0_2_chr6:15420581-15420819+	>NM_131205_hg19_9_11_239_0_2_chr3:185774864-185775064-	143	37	58	201	0.711443
CCE14-erm	>NM_131205_danRer6_10_11_102_0_0_chr6:15420899-15421000+	>NM_131205_hg19_10_11_102_0_0_chr3:185769819-185769920-	89	0	12	101	0.881188
	>NM_131205_danRer6_11_11_122_0_2_chr6:15421141-15421262+	>NM_131205_hg19_11_11_122_0_2_chr3:185766528-185766649-	87	0	34	121	0.719008
						AVERAGE	0.742948
	>NM_173219_danRer6_1_4_22_0_1_chr7:28385737-28385758-	>NM_173219_hg19_1_4_22_0_1_chr11:8289974-8289995-	17	0	4	21	0.809524
CCE_J-lmo1	>NM_173219_danRer6_2_4_214_1_2_chr7:28363347-28363560-	>NM_173219_hg19_2_4_214_1_2_chr11:8251838-8252051-	188	0	25	213	0.882629
CCE_N-lmo1	>NM_173219_danRer6_3_4_126_2_2_chr7:28351458-28351583-	>NM_173219_hg19_3_4_126_2_2_chr11:8248522-8248647-	101	0	24	125	0.808
	>NM_173219_danRer6_4_4_106_2_0_chr7:28346105-28346210-	>NM_173219_hg19_4_4_106_2_0_chr11:8246163-8246268-	89	0	16	105	0.847619
						AVERAGE	0.836943
	>NM_213390_danRer6_1_14_76_0_1_chr7:39158678-39158753+	>NM_213390_hg19_1_14_76_0_1_chr9:115802940-115803022-	33	0	42	75	0.44
	>NM_213390_danRer6_2_14_158_1_0_chr7:39158889-39159046+	>NM_213390_hg19_2_14_158_1_0_chr11:46741252-46741397+;chr19:21303295-21303303+	86	11	60	146	0.589041
	>NM_213390_danRer6_3_14_25_0_1_chr7:39159217-39159241+	>NM_213390_hg19_3_14_25_0_1_chr19:21303464-21303481+	7	7	10	17	0.411765
	>NM_213390_danRer6_4_14_72_1_1_chr7:39159861-39159932+	>NM_213390_hg19_4_14_72_1_1_chr19:22657966-22658028+	31	9	31	62	0.5
	>NM_213390_danRer6_6_14_131_2_1_chr7:39160377-39160507+	>NM_213390_hg19_6_14_131_2_1_chr11:46744963-46745068+	69	24	37	106	0.650943
	>NM_213390_danRer6_7_14_26_1_0_chr7:39161114-39161139+	>NM_213390_hg19_7_14_26_1_0_chr11:46747409-46747450+	12	0	13	25	0.48
	>NM_213390_danRer6_8_14_106_0_1_chr7:39163466-39163571+	>NM_213390_hg19_8_14_106_0_1_chr7:62745422-62745471-;chr11:46748135-46748176+	28	16	61	89	0.314607
	>NM_213390_danRer6_9_14_127_1_2_chr7:39163657-39163783+	>NM_213390_hg19_9_14_127_1_2_chr11:46748261-46748387+	72	0	54	126	0.571429
CCE17-f2	>NM_213390_danRer6_10_14_168_2_2_chr7:39164342-39164509+	>NM_213390_hg19_10_14_168_2_2_chr11:46749546-46749713+	126	0	41	167	0.754491
	>NM_213390_danRer6_11_14_174_2_2_chr7:39164636-39164809+	>NM_213390_hg19_11_14_174_2_2_chr11:46750214-46750387+	109	0	64	173	0.630058
	>NM_213390_danRer6_12_14_179_2_1_chr7:39166794-39166972+	>NM_213390_hg19_12_14_179_2_1_chr11:46750930-46751111+	116	6	56	172	0.674419
	>NM_213390_danRer6_13_14_71_1_0_chr7:39167082-39167152+	>NM_213390_hg19_13_14_71_1_0_chr11:46760598-46760668+	56	0	14	70	0.8
	>NM_213390_danRer6_14_14_156_0_0_chr7:39167249-39167404+	>NM_213390_hg19_14_14_156_0_0_chr11:46760815-46760961+	103	9	43	146	0.705479
						AVERAGE	0.578633
	>NM_001013278_danRer6_1_17_105_0_0_chr8:20472658-20472762-	>NM_001013278_hg19_1_17_105_0_0_chr19:6047418-6047507-	56	15	33	89	0.629213
	>NM_001013278_danRer6_2_17_90_0_0_chr8:20469112-20469201-	>NM_001013278_hg19_2_17_90_0_0_chr19:6044204-6044293-	59	0	30	89	0.662921
	>NM_001013278_danRer6_3_17_80_0_2_chr8:20468536-20468615-	>NM_001013278_hg19_3_17_80_0_2_chr19:6042055-6042134-	55	0	24	79	0.696203
	>NM_001013278_danRer6_4_17_262_2_0_chr8:20466238-20466499-	>NM_001013278_hg19_4_17_262_2_0_chr19:6039991-6040252-	164	3	94	258	0.635659
	>NM_001013278_danRer6_5_17_75_0_0_chr8:20463762-20463836-	>NM_001013278_hg19_5_17_75_0_0_chr19:6026174-6026248-	60	0	14	74	0.810811
	>NM_001013278_danRer6_6_17_182_0_2_chr8:20462178-20462359-	>NM_001013278_hg19_6_17_182_0_2_chr19:6016101-6016282-	144	0	37	181	0.79558
CCE19-rfx2	>NM_001013278_danRer6_7_17_120_2_2_chr8:20461785-20461904-	>NM_001013278_hg19_7_17_120_2_2_chr19:6012997-6013116-	96	0	23	119	0.806723
	>NM_001013278_danRer6_8_17_122_2_1_chr8:20457801-20457922-	>NM_001013278_hg19_8_17_122_2_1_chr19:6010147-6010262-	76	7	38	114	0.666667
	>NM_001013278_danRer6_9_17_119_1_0_chr8:20457582-20457700-	>NM_001013278_hg19_9_17_119_1_0_chr19:6008117-6008235-	68	0	50	118	0.576271
	>NM_001013278_danRer6_10_17_113_0_2_chr8:20449858-20449970-	>NM_001013278_hg19_10_17_113_0_2_chr19:6007701-6007813-	79	0	33	112	0.705357
	>NM_001013278_danRer6_11_17_158_2_1_chr8:20448744-20448901-	>NM_001013278_hg19_11_17_158_2_1_chr19:6007023-6007177-	112	6	39	151	0.741722
	>NM_001013278_danRer6_12_17_98_1_0_chr8:20448569-20448666-	>NM_001013278_hg19_12_17_98_1_0_chr19:6004212-6004309-	69	0	28	97	0.71134
	>NM_001013278_danRer6_13_17_150_0_0_chr8:20445922-20446071-	>NM_001013278_hg19_13_17_150_0_0_chr19:6002732-6002881-	125	0	24	149	0.838926
	>NM_001013278_danRer6_14_17_209_0_2_chr8:20443678-20443886-	>NM_001013278_hg19_14_17_209_0_2_chr19:6001826-6002034-	156	0	52	208	0.75
	>NM_001013278_danRer6_15_17_154_2_0_chr8:20441670-20441823-	>NM_001013278_hg19_15_17_154_2_0_chr19:5997071-5997224-	126	0	27	153	0.823529
	>NM_001013278_danRer6_16_17_43_0_1_chr8:20440537-20440579-	>NM_001013278_hg19_16_17_43_0_1_chr19:5995072-5995088-	2	31	9	11	0.181818
	>NM_001013278_danRer6_17_17_125_1_0_chr8:20440319-20440443-	>NM_001013278_hg19_17_17_125_1_0_chr19:5994846-5994988-	72	4	48	120	0.6
						AVERAGE	0.684279
CCE_E-dlx2a	>NM_131311_danRer6_1_3_316_0_1_chr9:3765471-3765786-	>NM_131311_hg19_1_3_316_0_1_chr2:172966867-172967266-	211	0	104	315	0.669841
	>NM_131311_danRer6_2_3_185_1_0_chr9:3764735-3764919-	>NM_131311_hg19_2_3_185_1_0_chr2:172966190-172966374-	148	0	36	184	0.804348
	>NM_131311_danRer6_3_3_315_0_0_chr9:3763190-3763504-	>NM_131311_hg19_3_3_315_0_0_chr7:96650076-96650111-;chr2:172965349-172965672-	184	13	117	301	0.611296
						AVERAGE	0.695162
	>NM_001003411_danRer6_3_14_183_1_1_chr9:39102194-39102376+	>NM_001003411_hg19_3_14_183_1_1_chr2:118577225-118577368+	83	39	60	143	0.58042
	>NM_001003411_danRer6_4_14_136_1_2_chr9:39103627-39103762+	>NM_001003411_hg19_4_14_136_1_2_chr2:118578737-118578872+	93	0	42	135	0.688889
	>NM_001003411_danRer6_5_14_101_2_1_chr9:39103843-39103943+	>NM_001003411_hg19_5_14_101_2_1_chr2:118579226-118579326+	71	0	29	100	0.71
	>NM_001003411_danRer6_6_14_200_1_0_chr9:39104035-39104234+	>NM_001003411_hg19_6_14_200_1_0_chr2:118579438-118579637+	145	0	54	199	0.728643
	>NM_001003411_danRer6_7_14_115_0_1_chr9:39104309-39104423+	>NM_001003411_hg19_7_14_115_0_1_chr2:118579723-118579837+	85	0	29	114	0.745614
	>NM_001003411_danRer6_8_14_140_1_0_chr9:39133758-39133897+	>NM_001003411_hg19_8_14_140_1_0_chr2:118582145-118582284+	103	0	36	139	0.741007
CCE_K-ddx18	>NM_001003411_danRer6_9_14_162_0_0_chr9:39133969-39134130+	>NM_001003411_hg19_9_14_162_0_0_chr2:118582516-118582677+	132	0	29	161	0.819876
	>NM_001003411_danRer6_10_14_153_0_0_chr9:39134203-39134355+	>NM_001003411_hg19_10_14_153_0_0_chr2:118583023-118583175+	117	0	35	152	0.769737
	>NM_001003411_danRer6_11_14_114_0_0_chr9:39134443-39134556+	>NM_001003411_hg19_11_14_114_0_0_chr2:118583845-118583958+	77	0	36	113	0.681416
	>NM_001003411_danRer6_12_14_57_0_0_chr9:39136330-39136386+	>NM_001003411_hg19_12_14_57_0_0_chr2:118586525-118586581+	44	0	12	56	0.785714
	>NM_001003411_danRer6_13_14_178_0_1_chr9:39136491-39136668+	>NM_001003411_hg19_13_14_178_0_1_chr2:118586865-118587042+	124	0	53	177	0.700565
	>NM_001003411_danRer6_14_14_146_1_0_chr9:39137440-39137585+	>NM_001003411_hg19_14_14_146_1_0_chr2:118588158-118588300+	93	3	49	142	0.65493
						AVERAGE	0.717234
	>NM_001142699_hg19_1_26_40_0_1_chr11:85309701-85309740-	>NM_001142699_danRer6_1_26_40_0_1_chr10:26906707-26906746-	27	0	12	39	0.692308
	>NM_001142699_hg19_5_26_162_0_0_chr11:84245613-84245774-	>NM_001142699_danRer6_5_26_162_0_0_chr10:27051729-27051893+	117	0	44	161	0.726708
	>NM_001142699_hg19_8_26_125_0_2_chr11:83809966-83810090-	>NM_001142699_danRer6_8_26_125_0_2_chr10:27310748-27310872-	92	0	32	124	0.741935
	>NM_001142699_hg19_9_26_170_2_1_chr11:83770358-83770527-	>NM_001142699_danRer6_9_26_170_2_1_chr10:27302010-27302179-	127	0	42	169	0.751479
	>NM_001142699_hg19_10_26_137_1_0_chr11:83691549-83691685-	>NM_001142699_danRer6_10_26_137_1_0_chr10:27351179-27351315+	112	0	24	136	0.823529
	>NM_001142699_hg19_11_26_145_0_1_chr11:83676367-83676511-	>NM_001142699_danRer6_11_26_145_0_1_chr10:27354021-27354165+	110	0	34	144	0.763889
	>NM_001142699_hg19_12_26_139_1_2_chr11:83673928-83674066-	>NM_001142699_danRer6_12_26_139_1_2_chr10:27354297-27354438+	93	0	45	138	0.673913
	>NM_001142699_hg19_13_26_156_2_2_chr11:83641371-83641526-	>NM_001142699_danRer6_13_26_156_2_2_chr10:27368512-27368670+	116	0	39	155	0.748387
	>NM_001142699_hg19_15_26_157_2_0_chr11:83544657-83544813-	>NM_001142699_danRer6_15_26_157_2_0_chr6:31953954-31954110+	112	0	44	156	0.717949
	>NM_001142699_hg19_16_26_103_0_1_chr11:83497733-83497835-	>NM_001142699_danRer6_16_26_103_0_1_chr2:3633037-3633139-	75	0	27	102	0.735294
	>NM_001142699_hg19_17_26_115_1_2_chr11:83344254-83344368-	>NM_001142699_danRer6_17_26_115_1_2_chr10:27217355-27217469-	98	0	16	114	0.859649
	>NM_001142699_hg19_18_26_177_2_2_chr11:83252725-83252901-	>NM_001142699_danRer6_18_26_177_2_2_chr10:27516603-27516779-	140	0	36	176	0.795455
	>NM_001142699_hg19_19_26_76_2_0_chr11:83243751-83243826-	>NM_001142699_danRer6_19_26_76_2_0_chr10:27510768-27510843-	54	0	21	75	0.72
CCE44-dlg2	>NM_001142699_hg19_20_26_100_0_1_chr11:83195172-83195271-	>NM_001142699_danRer6_20_26_100_0_1_chr10:27505642-27505741-	78	0	21	99	0.787879
	>NM_001142699_hg19_21_26_51_1_1_chr11:83183770-83183820-	>NM_001142699_danRer6_21_26_51_1_1_chr6:31994842-31994892+	36	0	14	50	0.72
	>NM_001142699_hg19_22_26_102_1_1_chr11:83182669-83182770-	>NM_001142699_danRer6_22_26_102_1_1_chr10:27495282-27495383-	79	0	22	101	0.782178
	>NM_001142699_hg19_23_26_173_1_0_chr11:83180244-83180416-	>NM_001142699_danRer6_23_26_173_1_0_chr10:27492570-27492742-	135	0	37	172	0.784884
	>NM_001142699_hg19_24_26_110_0_2_chr11:83177751-83177860-	>NM_001142699_danRer6_24_26_110_0_2_chr10:27492086-27492195-	81	0	28	109	0.743119
	>NM_001142699_hg19_25_26_92_2_1_chr11:83173045-83173136-	>NM_001142699_danRer6_25_26_92_2_1_chr10:27491891-27491982-	68	0	23	91	0.747253
	>NM_001142699_hg19_26_26_107_1_0_chr11:83170861-83170967-	>NM_001142699_danRer6_26_26_107_1_0_chr10:27488694-27488800-	82	0	24	106	0.773585
						AVERAGE	0.75447
CCE_D-fez1	>NM_213396_danRer6_1_9_317_0_2_chr10:29844131-29844447-	>NM_213396_hg19_1_9_317_0_2_chr11:125359363-125359673-	213	15	88	301	0.707641
	>NM_213396_danRer6_2_9_100_2_0_chr10:29837104-29837203-	>NM_213396_hg19_2_9_100_2_0_chr11:125351430-125351529-	61	0	38	99	0.616162
	>NM_213396_danRer6_3_9_87_0_0_chr10:29834717-29834803-	>NM_213396_hg19_3_9_87_0_0_chr11:125333380-125333466-	63	0	23	86	0.732558
	>NM_213396_danRer6_4_9_166_0_1_chr10:29833149-29833314-	>NM_213396_hg19_4_9_166_0_1_chr11:125330394-125330562-	112	0	53	165	0.678788
	>NM_213396_danRer6_5_9_275_1_0_chr10:29829489-29829763-	>NM_213396_hg19_5_9_275_1_0_chr11:125325731-125326002-	184	3	87	271	0.678967
	>NM_213396_danRer6_6_9_81_0_0_chr10:29824451-29824531-	>NM_213396_hg19_6_9_81_0_0_chr11:125324026-125324106-	65	0	15	80	0.8125
	>NM_213396_danRer6_7_9_76_0_1_chr10:29824269-29824344-	>NM_213396_hg19_7_9_76_0_1_chr11:125322230-125322305-	58	0	17	75	0.773333
	>NM_213396_danRer6_8_9_66_1_1_chr10:29823998-29824063-	>NM_213396_hg19_8_9_66_1_1_chr11:125318398-125318463-	35	0	30	65	0.538462
						AVERAGE	0.692301
	>NM_001007362_danRer6_1_14_235_0_1_chr11:1518963-1519197-	>NM_001007362_hg19_1_14_235_0_1_chr3:11058898-11059135+	173	0	61	234	0.739316
	>NM_001007362_danRer6_2_14_132_1_1_chr11:1518724-1518855-	>NM_001007362_hg19_2_14_132_1_1_chr3:11059529-11059660+	99	0	32	131	0.755725
	>NM_001007362_danRer6_3_14_101_1_0_chr11:1518255-1518355-	>NM_001007362_hg19_3_14_101_1_0_chr3:11060284-11060384+	80	0	20	100	0.8
	>NM_001007362_danRer6_4_14_110_0_2_chr11:1517891-1518000-	>NM_001007362_hg19_4_14_110_0_2_chr3:11061899-11062008+	88	0	21	109	0.807339
	>NM_001007362_danRer6_5_14_133_2_0_chr11:1517496-1517628-	>NM_001007362_hg19_5_14_133_2_0_chr3:11064022-11064154+	107	0	25	132	0.810606
	>NM_001007362_danRer6_6_14_135_0_0_chr11:1514293-1514427-	>NM_001007362_hg19_6_14_135_0_0_chr3:11067135-11067269+	105	0	29	134	0.783582
	>NM_001007362_danRer6_7_14_104_0_2_chr11:1511394-1511497-	>NM_001007362_hg19_7_14_104_0_2_chr3:11067459-11067562+	84	0	19	103	0.815534
	>NM_001007362_danRer6_8_14_125_2_1_chr11:1511125-1511249-	>NM_001007362_hg19_8_14_125_2_1_chr3:11067921-11068045+	105	0	19	124	0.846774
	>NM_001007362_danRer6_9_14_113_1_0_chr11:1510624-1510736-	>NM_001007362_hg19_9_14_113_1_0_chr3:11070421-11070533+	91	0	21	112	0.8125
	>NM_001007362_danRer6_10_14_132_0_0_chr11:1509247-1509378-	>NM_001007362_hg19_10_14_132_0_0_chr3:11070907-11071038+	94	0	37	131	0.717557
	>NM_001007362_danRer6_11_14_103_0_1_chr11:1507110-1507212-	>NM_001007362_hg19_11_14_103_0_1_chr3:11072863-11072965+	86	0	16	102	0.843137
	>NM_001007362_danRer6_12_14_101_1_0_chr11:1504132-1504232-	>NM_001007362_hg19_12_14_101_1_0_chr3:11075325-11075425+	73	0	27	100	0.73
CCE11-zgc103663	>NM_001007362_danRer6_13_14_168_0_0_chr11:1501012-1501179-	>NM_001007362_hg19_13_14_168_0_0_chr3:11076217-11076384+	129	0	38	167	0.772455
						AVERAGE	0.787271
	>NM_213539_danRer6_1_24_166_0_1_chr11:24617603-24617768+	>NM_213539_hg19_1_24_166_0_1_chr1:201798338-201798500+	105	4	56	161	0.652174
	>NM_213539_danRer6_3_24_87_0_0_chr11:24622036-24622122+	>NM_213539_hg19_3_24_87_0_0_chr1:201816680-201816766+	69	0	17	86	0.802326
	>NM_213539_danRer6_4_24_202_0_1_chr11:24622199-24622400+	>NM_213539_hg19_4_24_202_0_1_chr1:201817521-201817722+	152	0	49	201	0.756219
	>NM_213539_danRer6_5_24_89_1_0_chr11:24622487-24622575+	>NM_213539_hg19_5_24_89_1_0_chr1:201821232-201821320+	68	0	20	88	0.772727
	>NM_213539_danRer6_7_24_120_0_0_chr11:24624579-24624698+	>NM_213539_hg19_7_24_120_0_0_chr1:201823723-201823842+	94	0	25	119	0.789916
	>NM_213539_danRer6_8_24_101_0_2_chr11:24624776-24624876+	>NM_213539_hg19_8_24_101_0_2_chr1:201823951-201824051+	83	0	17	100	0.83
	>NM_213539_danRer6_9_24_59_2_1_chr11:24624979-24625037+	>NM_213539_hg19_9_24_59_2_1_chr1:201824252-201824310+	48	0	10	58	0.827586
	>NM_213539_danRer6_10_24_152_1_0_chr11:24628282-24628433+	>NM_213539_hg19_10_24_152_1_0_chr1:201824911-201825062+	119	0	32	151	0.788079
	>NM_213539_danRer6_11_24_99_0_0_chr11:24628530-24628628+	>NM_213539_hg19_11_24_99_0_0_chr1:201826224-201826322+	77	0	21	98	0.785714
	>NM_213539_danRer6_12_24_107_0_2_chr11:24628717-24628823+	>NM_213539_hg19_12_24_107_0_2_chr1:201827575-201827681+	78	0	28	106	0.735849
	>NM_213539_danRer6_13_24_140_2_1_chr11:24631091-24631230+	>NM_213539_hg19_13_24_140_2_1_chr1:201827983-201828122+	104	0	35	139	0.748201
	>NM_213539_danRer6_14_24_163_1_2_chr11:24631324-24631486+	>NM_213539_hg19_14_24_163_1_2_chr1:201832573-201832735+	124	0	38	162	0.765432
	>NM_213539_danRer6_15_24_227_2_1_chr11:24633241-24633467+	>NM_213539_hg19_15_24_227_2_1_chr1:201835861-201836087+	167	0	59	226	0.738938
	>NM_213539_danRer6_16_24_149_1_0_chr11:24633547-24633695+	>NM_213539_hg19_16_24_149_1_0_chr1:201837776-201837924+	116	0	32	148	0.783784
	>NM_213539_danRer6_17_24_129_0_0_chr11:24634583-24634711+	>NM_213539_hg19_17_24_129_0_0_chr1:201838718-201838846+	96	0	32	128	0.75
	>NM_213539_danRer6_18_24_276_0_0_chr11:24634815-24635090+	>NM_213539_hg19_18_24_276_0_0_chr1:201839711-201839986+	214	0	61	275	0.778182
CCEF-ipo9	>NM_213539_danRer6_19_24_167_0_2_chr11:24637072-24637238+	>NM_213539_hg19_19_24_167_0_2_chr1:201840289-201840455+	132	0	34	166	0.795181
	>NM_213539_danRer6_20_24_134_2_1_chr11:24637325-24637458+	>NM_213539_hg19_20_24_134_2_1_chr1:201841956-201842089+	91	0	42	133	0.684211
	>NM_213539_danRer6_21_24_120_1_1_chr11:24637537-24637656+	>NM_213539_hg19_21_24_120_1_1_chr1:201843378-201843500+	90	0	29	119	0.756303
	>NM_213539_danRer6_22_24_108_1_1_chr11:24637750-24637857+	>NM_213539_hg19_22_24_108_1_1_chr1:201843963-201844064+	45	12	50	95	0.473684
	>NM_213539_danRer6_23_24_77_1_0_chr11:24640450-24640526+	>NM_213539_hg19_23_24_77_1_0_chr1:201844280-201844356+	33	0	43	76	0.434211
	>NM_213539_danRer6_24_24_111_0_0_chr11:24640628-24640738+	>NM_213539_hg19_24_24_111_0_0_chr1:201845072-201845182+	83	0	27	110	0.754545
						AVERAGE	0.736512
	>NM_131184_danRer6_1_10_43_0_1_chr13:29267263-29267305+	>NM_131184_hg19_1_10_43_0_1_chr10:102506018-102506060+	40	0	2	42	0.952381
	>NM_131184_danRer6_2_10_166_1_2_chr13:29268965-29269130+	>NM_131184_hg19_2_10_166_1_2_chr10:102509506-102509671+	136	0	29	165	0.824242
	>NM_131184_danRer6_3_10_198_2_2_chr13:29269809-29270006+	>NM_131184_hg19_3_10_198_2_2_chr10:102510451-102510648+	157	0	40	197	0.796954
	>NM_131184_danRer6_4_10_86_2_1_chr13:29274115-29274200+	>NM_131184_hg19_4_10_86_2_1_chr10:102539255-102539340+	60	0	25	85	0.705882
CCE_B-pax2a	>NM_131184_danRer6_5_10_120_1_1_chr13:29274349-29274468+	>NM_131184_hg19_5_10_120_1_1_chr10:102541003-102541122+	100	0	19	119	0.840336
	>NM_131184_danRer6_6_10_176_1_0_chr13:29281763-29281938+	>NM_131184_hg19_6_10_176_1_0_chr10:102566187-102566362+	138	0	37	175	0.788571
	>NM_131184_danRer6_7_10_121_0_1_chr13:29283816-29283936+	>NM_131184_hg19_7_10_121_0_1_chr10:102568867-102568993+	88	0	32	120	0.733333
	>NM_131184_danRer6_8_10_102_1_1_chr13:29295152-29295253+	>NM_131184_hg19_8_10_102_1_1_chr10:102584405-102584506+	83	0	18	101	0.821782
	>NM_131184_danRer6_9_10_87_1_1_chr13:29297854-29297940+	>NM_131184_hg19_9_10_87_1_1_chr10:102586766-102586852+	66	0	20	86	0.767442
	>NM_131184_danRer6_10_10_77_1_0_chr13:29298240-29298316+	>NM_131184_hg19_10_10_77_1_0_chr10:102587300-102587376+	69	0	7	76	0.907895
						AVERAGE	0.813882
	>NM_201496_danRer6_2_8_251_0_2_chr13:29462821-29463071-	>NM_201496_hg19_2_8_251_0_2_chr10:102296168-102296418+	174	0	76	250	0.696
	>NM_201496_danRer6_3_8_149_2_1_chr13:29462118-29462266-	>NM_201496_hg19_3_8_149_2_1_chr10:102300391-102300539+	112	0	36	148	0.756757
	>NM_201496_danRer6_4_8_146_1_0_chr13:29461581-29461726-	>NM_201496_hg19_4_8_146_1_0_chr10:102304708-102304853+	117	0	28	145	0.806897
	>NM_201496_danRer6_5_8_107_0_2_chr13:29460586-29460692-	>NM_201496_hg19_5_8_107_0_2_chr10:102305700-102305806+	81	0	25	106	0.764151
	>NM_201496_danRer6_6_8_64_2_0_chr13:29454474-29454537-	>NM_201496_hg19_6_8_64_2_0_chr10:102306275-102306338+	50	0	13	63	0.793651
CCE8-hif1an	>NM_201496_danRer6_7_8_111_0_0_chr13:29454274-29454384-	>NM_201496_hg19_7_8_111_0_0_chr10:102306897-102307007+	95	0	15	110	0.863636
	>NM_201496_danRer6_8_8_57_0_0_chr13:29449358-29449414-	>NM_201496_hg19_8_8_57_0_0_chr10:102307850-102307893+	32	13	11	43	0.744186
						AVERAGE	0.77504
	>NM_182860_danRer6_2_10_206_2_1_chr13:48167614-48167819-	>NM_182860_hg19_2_10_206_2_1_chr2:48018059-48018262+	117	3	85	202	0.579208
	>NM_182860_danRer6_3_10_176_1_0_chr13:48165402-48165577-	>NM_182860_hg19_3_10_176_1_0_chr2:48023033-48023202+	97	6	72	169	0.573964
	>NM_182860_danRer6_4_10_2557_0_1_chr13:48161188-48163744-	>NM_182860_hg19_4_10_2557_0_1_chr2:48025770-48028294+	1571	73	912	2483	0.632702
	>NM_182860_danRer6_5_10_290_1_0_chr13:48159027-48159316-	>NM_182860_hg19_5_10_290_1_0_chr2:48030559-48030824+	173	27	89	262	0.660305
	>NM_182860_danRer6_6_10_118_0_1_chr13:48156405-48156522-	>NM_182860_hg19_6_10_118_0_1_chr2:48032049-48032166+	79	0	38	117	0.675214
	>NM_182860_danRer6_7_10_90_1_1_chr13:48156232-48156321-	>NM_182860_hg19_7_10_90_1_1_chr2:48032757-48032846+	63	0	26	89	0.707865
	>NM_182860_danRer6_8_10_155_1_0_chr13:48155508-48155662-	>NM_182860_hg19_8_10_155_1_0_chr2:48033343-48033497+	102	0	52	154	0.662338
CCE1-msh6	>NM_182860_danRer6_9_10_200_0_2_chr13:48153944-48154143-	>NM_182860_hg19_9_10_200_0_2_chr2:48033591-48033790+	142	0	57	199	0.713568
						AVERAGE	0.650646
	>NM_007325_hg19_1_15_109_0_1_chrX:122318388-122318496+	>NM_007325_danRer6_1_15_109_0_1_chr14:13324573-13324663-	59	17	32	91	0.648352
	>NM_007325_hg19_2_15_159_1_1_chrX:122319684-122319842+	>NM_007325_danRer6_2_15_159_1_1_chr14:13323989-13324147-	123	0	35	158	0.778481
	>NM_007325_hg19_3_15_240_1_1_chrX:122387154-122387393+	>NM_007325_danRer6_3_15_240_1_1_chr14:13265288-13265527-	202	0	37	239	0.845188
	>NM_007325_hg19_4_15_188_1_0_chrX:122459877-122460064+	>NM_007325_danRer6_4_15_188_1_0_chr14:13190359-13190546-	155	0	32	187	0.828877
	>NM_007325_hg19_6_15_162_0_0_chrX:122528819-122528980+	>NM_007325_danRer6_6_15_162_0_0_chr14:13141708-13141869-	111	0	50	161	0.689441
	>NM_007325_hg19_7_15_168_0_0_chrX:122532487-122532654+	>NM_007325_danRer6_7_15_168_0_0_chr14:13138415-13138582-	126	0	41	167	0.754491
	>NM_007325_hg19_8_15_105_0_0_chrX:122536845-122536949+	>NM_007325_danRer6_8_15_105_0_0_chr14:13125835-13125939-	80	0	24	104	0.769231
	>NM_007325_hg19_9_15_108_0_0_chrX:122537263-122537370+	>NM_007325_danRer6_9_15_108_0_0_chr14:13123598-13123705-	70	0	37	107	0.654206
	>NM_007325_hg19_10_15_207_0_0_chrX:122538559-122538765+	>NM_007325_danRer6_10_15_207_0_0_chr14:13095705-13095911-	158	0	48	206	0.76699
	>NM_007325_hg19_11_15_377_0_2_chrX:122551253-122551629+	>NM_007325_danRer6_11_15_377_0_2_chr14:13093445-13093818-	288	4	84	372	0.774194
	>NM_007325_hg19_12_15_199_2_0_chrX:122561792-122561990+	>NM_007325_danRer6_12_15_199_2_0_chr14:13080142-13080340-	163	0	35	198	0.823232
	>NM_007325_hg19_13_15_248_0_2_chrX:122598716-122598963+	>NM_007325_danRer6_13_15_248_0_2_chr14:13042466-13042713-	208	0	39	247	0.842105
CCE42-gria3b	>NM_007325_hg19_14_15_115_2_0_chrX:122613914-122614028+	>NM_007325_danRer6_14_15_115_2_0_chr14:13025825-13025939-	108	0	6	114	0.947368
	>NM_007325_hg19_15_15_246_0_0_chrX:122616650-122616895+	>NM_007325_danRer6_15_15_246_0_0_chr14:13024395-13024641-	200	0	45	245	0.816327
						AVERAGE	0.78132
CCE47-hoxa5	>NM_019102_hg19_1_2_562_0_1_chr7:27182665-27183226-	>NM_019102_danRer6_1_2_562_0_1_chr19:14034442-14034988+	344	51	166	510	0.67451
	>NM_019102_hg19_2_2_251_1_0_chr7:27181454-27181704-	>NM_019102_danRer6_2_2_251_1_0_chr19:14035496-14035746+	201	2	47	248	0.810484
						AVERAGE	0.742497
	>NM_199707_danRer6_1_12_135_0_0_chr22:21780755-21780889-	>NM_199707_hg19_1_12_135_0_0_chr19:18632731-18632865-	95	0	39	134	0.708955
	>NM_199707_danRer6_3_12_122_0_2_chr22:21733309-21733430-	>NM_199707_hg19_3_12_122_0_2_chr19:18576607-18576728-	88	0	33	121	0.727273
CCE6-ell	>NM_199707_danRer6_4_12_164_2_1_chr22:21725693-21725856-	>NM_199707_hg19_4_12_164_2_1_chr19:18576222-18576385-	127	0	36	163	0.779141
	>NM_199707_danRer6_5_12_245_1_0_chr22:21723767-21724011-	>NM_199707_hg19_5_12_245_1_0_chr19:18572388-18572662-	144	0	100	244	0.590164
	>NM_199707_danRer6_6_12_125_0_2_chr22:21722096-21722220-	>NM_199707_hg19_6_12_125_0_2_chr19:18569015-18569139-	94	0	30	124	0.758065
	>NM_199707_danRer6_7_12_91_2_0_chr22:21715143-21715233-	>NM_199707_hg19_7_12_91_2_0_chr19:18562362-18562458-	58	4	28	86	0.674419
	>NM_199707_danRer6_8_12_574_0_1_chr22:21712027-21712600-	>NM_199707_hg19_8_12_574_0_1_chr19:18561350-18561791-	245	187	141	386	0.634715
	>NM_199707_danRer6_9_12_67_1_2_chr22:21709132-21709198-	>NM_199707_hg19_9_12_67_1_2_chr19:18557558-18557624-	47	0	19	66	0.712121
	>NM_199707_danRer6_10_12_172_2_0_chr22:21708787-21708958-	>NM_199707_hg19_10_12_172_2_0_chr19:18557119-18557290-	124	0	47	171	0.725146
	>NM_199707_danRer6_11_12_45_0_0_chr22:21706088-21706132-	>NM_199707_hg19_11_12_45_0_0_chr19:18556034-18556078-	28	0	16	44	0.636364
	>NM_199707_danRer6_12_12_117_0_0_chr22:21705881-21705997-	>NM_199707_hg19_12_12_117_0_0_chr19:18555562-18555678-	81	0	35	116	0.698276
						AVERAGE	0.694967
	>NM_201323_danRer6_1_5_203_0_2_chr22:348587-348789+	>NM_201323_hg19_1_5_203_0_2_chr6:36564540-36564745+	155	0	47	202	0.767327
	>NM_201323_danRer6_2_5_138_2_2_chr22:350073-350210+	>NM_201323_hg19_2_5_138_2_2_chr6:36566626-36566760+	91	3	43	134	0.679104
CCE49-sfrs3b	>NM_201323.1_danRer6_1_1_1_1_0_A=frame2_TGA=stop_chr22:351126-351159_Plasmid49_+_SFRS3b	>NM_003017_hg19_1_1_1_1_0_A=frame2_TGA=stop_chr6(+):36567598-36567631					0.76049
	>NM_201323_danRer6_3_5_39_2_2_chr22:352005-352043+	>NM_201323_hg19_3_5_39_2_2_chr6:36568929-36568967+	30	0	8	38	0.789474
	>NM_201323_danRer6_4_5_87_2_2_chr22:352128-352214+	>NM_201323_hg19_4_5_87_2_2_chr6:36569485-36569571+	63	0	23	86	0.732558
						AVERAGE	0.745791
	>NM_201106_danRer6_1_7_238_0_1_chr22:410430-410667+	>NM_201106_hg19_1_7_238_0_1_chr6:41889301-41889568+	149	0	88	237	0.628692
	>NM_201106_danRer6_2_7_142_1_2_chr22:412972-413113+	>NM_201106_hg19_2_7_142_1_2_chr6:41895121-41895274+	95	6	40	135	0.703704
	>NM_201106_danRer6_3_7_139_2_0_chr22:413514-413652+	>NM_201106_hg19_3_7_139_2_0_chr6:41897870-41898008+	108	0	30	138	0.782609
CCE_A-bysl	>NM_201106_danRer6_4_7_134_0_2_chr22:413800-413933+	>NM_201106_hg19_4_7_134_0_2_chr6:41898373-41898506+	110	0	23	133	0.827068
	>NM_201106_danRer6_5_7_161_2_1_chr22:414993-415153+	>NM_201106_hg19_5_7_161_2_1_chr6:41899134-41899294+	131	0	29	160	0.81875
	>NM_201106_danRer6_6_7_103_1_2_chr22:416064-416166+	>NM_201106_hg19_6_7_103_1_2_chr6:41899466-41899568+	84	0	18	102	0.823529
	>NM_201106_danRer6_7_7_352_2_0_chr22:416981-417332+	>NM_201106_hg19_7_7_352_2_0_chr6:41900099-41900424+	236	26	89	325	0.726154
						AVERAGE	0.758644
	>NM_201448_danRer6_1_13_109_0_1_chr23:17259585-17259693+	>NM_201448_hg19_1_13_109_0_1_chr12:57145980-57146073-	60	14	34	94	0.638298
	>NM_201448_danRer6_2_13_158_1_0_chr23:17260272-17260429+	>NM_201448_hg19_2_13_158_1_0_chr12:57144822-57144979-	118	0	39	157	0.751592
	>NM_201448_danRer6_3_13_107_0_2_chr23:17261338-17261444+	>NM_201448_hg19_3_13_107_0_2_chr12:57140710-57140816-	86	0	20	106	0.811321
	>NM_201448_danRer6_4_13_74_2_1_chr23:17261782-17261855+	>NM_201448_hg19_4_13_74_2_1_chr12:57140565-57140638-	51	0	22	73	0.69863
	>NM_201448_danRer6_5_13_137_1_0_chr23:17261943-17262079+	>NM_201448_hg19_5_13_137_1_0_chr12:57139829-57139965-	95	0	41	136	0.698529
	>NM_201448_danRer6_6_13_59_0_2_chr23:17262538-17262596+	>NM_201448_hg19_6_13_59_0_2_chr12:57137849-57137907-	33	0	25	58	0.568966
	>NM_201448_danRer6_7_13_110_2_1_chr23:17262682-17262791+	>NM_201448_hg19_7_13_110_2_1_chr12:57136771-57136880-	63	3	43	106	0.59434
CCE7-prim1	>NM_201448_danRer6_9_13_136_0_1_chr23:17264451-17264586+	>NM_201448_hg19_9_13_136_0_1_chr12:57135219-57135319-	86	34	15	101	0.851485
	>NM_201448_danRer6_10_13_70_1_2_chr23:17266474-17266543+	>NM_201448_hg19_10_13_70_1_2_chr12:57133078-57133147-	50	0	19	69	0.724638
	>NM_201448_danRer6_11_13_107_2_1_chr23:17266668-17266774+	>NM_201448_hg19_11_13_107_2_1_chr12:57132218-57132309-	48	21	37	85	0.564706
	>NM_201448_danRer6_12_13_99_1_1_chr23:17266864-17266962+	>NM_201448_hg19_12_13_99_1_1_chr12:57127931-57128029-	66	0	32	98	0.673469
						AVERAGE	0.688725
	>NM_001002533_danRer6_2_12_168_2_2_chr25:13362277-13362444-	>NM_001002533_hg19_2_12_168_2_2_chr17:29848234-29848378+	104	22	41	145	0.717241
CCE20-rab11fip4a	>NM_001002533_danRer6_3_12_135_2_2_chr25:13360528-13360662-	>NM_001002533_hg19_3_12_135_2_2_chr17:29848933-29849067+	109	0	25	134	0.813433
	>NM_001002533_danRer6_5_12_100_2_0_chr25:13354203-13354302-	>NM_001002533_hg19_5_12_100_2_0_chr17:29850530-29850629+	83	0	16	99	0.838384
	>NM_001002533_danRer6_6_12_104_0_2_chr25:13354012-13354115-	>NM_001002533_hg19_6_12_104_0_2_chr17:29850911-29851014+	77	0	26	103	0.747573
	>NM_001002533_danRer6_7_12_141_2_2_chr25:13353356-13353496-	>NM_001002533_hg19_7_12_141_2_2_chr17:29852108-29852248+	103	0	37	140	0.735714
	>NM_001002533_danRer6_8_12_82_2_0_chr25:13353160-13353241-	>NM_001002533_hg19_8_12_82_2_0_chr17:29854860-29854941+	57	0	24	81	0.703704
	>NM_001002533_danRer6_9_12_138_0_0_chr25:13348926-13349063-	>NM_001002533_hg19_9_12_138_0_0_chr17:29855424-29855561+	104	0	33	137	0.759124
	>NM_001002533_danRer6_10_12_156_0_0_chr25:13348675-13348830-	>NM_001002533_hg19_10_12_156_0_0_chr17:29855638-29855796+	103	0	52	155	0.664516
	>NM_001002533_danRer6_11_12_144_0_0_chr25:13348238-13348381-	>NM_001002533_hg19_11_12_144_0_0_chr17:29857344-29857487+	108	0	35	143	0.755245
CCE5-rab11fip4a	>NM_001002533_danRer6_12_12_117_0_0_chr25:13345515-13345631-	>NM_001002533_hg19_12_12_117_0_0_chr17:29858634-29858750+	93	0	23	116	0.801724
						AVERAGE	0.753666
	>NM_144763_danRer6_1_18_119_0_2_chr25:36998923-36999041-	>NM_144763_hg19_1_18_119_0_2_chr19:34856172-34856293+	70	0	48	118	0.59322
	>NM_144763_danRer6_3_18_69_0_0_chr25:36993324-36993392-	>NM_144763_hg19_3_18_69_0_0_chr19:34857688-34857756+	51	0	17	68	0.75
	>NM_144763_danRer6_4_18_120_0_0_chr25:36991362-36991481-	>NM_144763_hg19_4_18_120_0_0_chr19:34859488-34859607+	91	0	28	119	0.764706
	>NM_144763_danRer6_5_18_84_0_0_chr25:36989009-36989092-	>NM_144763_hg19_5_18_84_0_0_chr19:34868408-34868491+	58	0	25	83	0.698795
CCE12-gpia	>NM_144763_danRer6_6_18_147_0_0_chr25:36988254-36988400-	>NM_144763_hg19_6_18_147_0_0_chr19:34868640-34868786+	117	0	29	146	0.80137
	>NM_144763_danRer6_7_18_72_0_0_chr25:36987744-36987815-	>NM_144763_hg19_7_18_72_0_0_chr19:34869839-34869910+	57	0	14	71	0.802817
	>NM_144763_danRer6_9_18_54_0_0_chr25:36986618-36986671-	>NM_144763_hg19_9_18_54_0_0_chr19:34872371-34872424+	43	0	10	53	0.811321
	>NM_144763_danRer6_10_18_61_0_1_chr25:36986432-36986492-	>NM_144763_hg19_10_18_61_0_1_chr19:34884153-34884213+	46	0	14	60	0.766667
	>NM_144763_danRer6_11_18_44_1_0_chr25:36984779-36984822-	>NM_144763_hg19_11_18_44_1_0_chr19:34884633-34884676+	38	0	5	43	0.883721
	>NM_144763_danRer6_12_18_153_0_0_chr25:36984265-36984417-	>NM_144763_hg19_12_18_153_0_0_chr19:34884819-34884971+	116	0	36	152	0.763158
	>NM_144763_danRer6_13_18_130_0_1_chr25:36981698-36981827-	>NM_144763_hg19_13_18_130_0_1_chr19:34887206-34887335+	106	0	23	129	0.821705
	>NM_144763_danRer6_14_18_77_1_0_chr25:36980658-36980734-	>NM_144763_hg19_14_18_77_1_0_chr19:34887486-34887562+	51	0	25	76	0.671053
	>NM_144763_danRer6_15_18_129_0_0_chr25:36979836-36979964-	>NM_144763_hg19_15_18_129_0_0_chr19:34890112-34890240+	91	0	37	128	0.710938
	>NM_144763_danRer6_16_18_76_0_1_chr25:36977846-36977921-	>NM_144763_hg19_16_18_76_0_1_chr19:34890461-34890536+	53	0	22	75	0.706667
	>NM_144763_danRer6_17_18_67_1_2_chr25:36975646-36975712-	>NM_144763_hg19_17_18_67_1_2_chr19:34890624-34890690+	56	0	10	66	0.848485
	>NM_144763_danRer6_18_18_124_2_0_chr25:36974097-36974220-	>NM_144763_hg19_18_18_124_2_0_chr19:34890806-34890923+	81	6	36	117	0.692308
						AVERAGE	0.755433
	>NM_199979_danRer6_1_10_130_0_1_chr25:38646973-38647102+	>NM_199979_hg19_1_10_130_0_1_chr11:35338924-35339053-	81	0	48	129	0.627907
CCE16-slc1a2	>NM_199979_danRer6_2_10_153_1_1_chr25:38647317-38647469+	>NM_199979_hg19_2_10_153_1_1_chr11:35336570-35336722-	110	0	42	152	0.723684
	>NM_199979_danRer6_3_10_251_1_0_chr25:38647585-38647835+	>NM_199979_hg19_3_10_251_1_0_chr11:35333745-35333995-	182	0	68	250	0.728
	>NM_199979_danRer6_4_10_151_0_1_chr25:38649039-38649189+	>NM_199979_hg19_4_10_151_0_1_chr11:35327621-35327789-	72	28	50	122	0.590164
	>NM_199979_danRer6_5_10_127_1_2_chr25:38649303-38649429+	>NM_199979_hg19_5_10_127_1_2_chr11:35323066-35323192-	99	0	27	126	0.785714
	>NM_199979_danRer6_6_10_234_2_2_chr25:38649748-38649981+	>NM_199979_hg19_6_10_234_2_2_chr11:35313834-35314067-	180	0	53	233	0.772532
	>NM_199979_danRer6_7_10_195_2_2_chr25:38650110-38650304+	>NM_199979_hg19_7_10_195_2_2_chr11:35308304-35308498-	146	0	48	194	0.752577
	>NM_199979_danRer6_8_10_135_2_2_chr25:38654944-38655078+	>NM_199979_hg19_8_10_135_2_2_chr1:53555472-53555606-	88	0	46	134	0.656716
	>NM_199979_danRer6_9_10_235_2_0_chr25:38655243-38655477+	>NM_199979_hg19_9_10_235_2_0_chr11:35287074-35287305-	168	3	63	231	0.727273
						AVERAGE	0.707174

## Sheet: Exon-Cons,Total,Rank
Column C lists the average conservation of exons in the Gene, Column D is the conservation of the exon tested in the experimental assay. Column F is the exon rank (the number of the exon in the gene, according to UCSC Genome Browser CDS Fasta Records. Column G characterizes the overall expression of the tested exon, with 1 = drives GFP expression , 0 = does not drive GFP expression and W = drives…
PlasmidInternalID	CCE-name	Average Conservation of All Exons in Gene	Conservation of Exon Tested	TotalExons	ExonRank	Expression (1 = yes, 0 = no, W = weak)
1	CCE-msh6	65	71	10	9	0
2	CCE-ephb3a(formerly:ek3)	70	80	16	13	1
5	CCE-rab11fip4a	75	80	12	12	1
6	CCE-ell	69	78	12	4	0
7	CCE-prim1	69	85	13	9	1
8	CCE-hif1an	78	86	8	7	w
9	CCE-abca1a	72	82	49	14	1
11	CCE-zgc:103663	79	77	14	13	w
12	CCE-gpia	76	80	18	6	0
14	CCE-erm	74	88	11	10	w
16	CCE-slc1a2	71	72	10	2	1
17	CCE-f2	58	75	14	10	1
18	CCE-odz3	74	75	27	2	1
19	CCE-rfx2	68	81	17	7	1
20	CCE-rab11fip4a	75	81	12	3	1
42	CCE-gria3b (UCR)	78	95	15	14	1
44	CCE-dlg2 (UCR)	75	79	26	20	0
47	CCE-hoxa5a (UCR)	74	67	2	1	1
49	CCE-sfrs3b	75	76	5	3	1
51	CCE-ddx5 (UCR)	75	75	13	12	1
A	CCE-bysl	76	83	7	4	1
B	CCE-pax2a	81	84	10	5	1
C	CCE-foxp1b	74	86	16	13	w
D	CCE-fez1	69	71	9	1	1
E	CCE-dlx2a	70	67	3	1	0
F	CCE-ipo9	74	80	24	19	0
J	CCE-lmo1	84	88	4	2	1
K	CCE-ddx18	72	82	14	9	1
L	CCE-rab40c	82	85	6	1	0
M	CCE-isl1	83	86	6	5	1
N	CCE-lmo1	84	81	4	3	1
	AVERAGE	74.1613	79.871
