# Supplementary material for: Transcriptional Enhancers in Protein-Coding Exons of Vertebrate Developmental Genes
Source: PLoS One. 2012 May 2;7(5):e35202. doi: 10.1371/journal.pone.0035202 (PMC3342275; doi:10.1371/journal.pone.0035202)
Supplement: Data File S2 — Data file of wilcox.test and prop.test scores. The raw expression proportion (top) displays the fraction of surviving embryos with expression in each listed anatomy. X (green) shows the ratio of expression fraction for statistically significant anatomies, which are highlighted in yellow. We consider anatomies as significant if they have p≤0.05 (shown in red) for both the Wilcoxon and Proportions test (middle and bottom). (XLS) [file pone.0035202.s015.xls]

## Sheet: RawProportion,Prop,Wilcox,Xprop
PLASMID InternalID	Control	2	X	5	X	7	X	9	X	16	X	17	X	18	X	19	X	20	X	A	X	B	X	D	X	J	X	K	X	M	X	N	X	42	X	47	X	49	X	51	X
PLASMID NAME	Control	CCE-ephb3a(formerly:ek3)	X	CCE-rab11fip4a	X	CCE-prim1	X	CCE-abca1a	X	CCE-slc1a2	X	CCE-f2	X	CCE-odz3	X	CCE-rfx2	X	CCE-rab11fip4a	X	CCE-bysl	X	CCE-pax2a	X	CCE-fez1	X	CCE-lmo1(2)	X	CCE-ddx18	X	CCE-isl1	X	CCE-lmo1	X	CCE-gria3b (UCR)	X	CCE-hoxa5a (UCR)	X	CCE-sfrs3b (UCR)	X	CCE-ddx5 (UCR)	X
Total Embryos Scored By Voice-Recognition	161	76		53		46		43		61		67		39		48		77		53		73		67		20		48		58		82		87		15		53		38
Raw Expression proportion
Forebrain:	0.3354	0.552632	1.64768	0.433962		0.630435	1.87965	0.348837		0.639344	1.90621	0.626866	1.86901	0.820513	2.44637	0.375		0.0909091		0.320755		0.643836	1.91961	0.597015	1.78001	1	2.98151	0.625	1.86345	0.431034		0.634146	1.89072	0.666667	1.98768	0.466667		1	2.98151	0.736842	2.19691
Midbrain/Hindbrain:	0.2546	0.434211	1.70546	0.150943		0.23913		0.395349		0.0819672		0.38806		0.025641		0.125		0.142857		0.471698	1.8527	0.191781		0.641791	2.52078	0.95	3.73134	0.666667	2.61849	0.534483	2.0993	0.243902		0.149425		0.266667		1	3.92773	0.447368	1.75714
Eye:	0.18	0.355263	1.97368	0.226415		0.0652174		0.44186	2.45478	0.0655738		0.328358	1.82421	0.0769231		0.166667		0.181818		0.245283		0.150685		0.656716	3.64842	0.9	5	0.270833		0.155172		0.0365854		0.091954		0.466667	2.59259	1	5.55556	0.447368	2.48538
Ear/AboveHeart:	0.068	0.0921053		0.0188679		0		0.0697674		0.0491803		0.104478		0.282051	4.14781	0.0208333		0.025974		0.0566038		0.0136986		0.253731	3.73134	0.95	13.9706	0.0625		0		0.963415	14.1679	0		0.133333		1	14.7059	0
Heart:	0.316	0.131579		0.226415		0.434783		0		0.0819672		0.104478		0.153846		0.104167		0.103896		0.150943		0.0547945		0.134328		0.85	2.68987	0.0416667		0.793103	2.50982	0.292683		0.83908	2.65532	0		0		0.263158
Notochord:	0.161	0.223684		0.603774	3.75015	0.152174		0.395349	2.45558	0.0819672		0.283582	1.76138	0.0769231		0.104167		0.0519481		0.150943		0.30137	1.87186	0.19403		0.8	4.96894	0.104167		0.12069		0.182927		0.045977		0.266667		1	6.21118	0.289474
Yolk/YolkExtension:	0.155	0.460526	2.97114	0.207547		0.0652174		0.395349	2.55064	0.655738	4.23057	0.328358	2.11844	0.128205		0.270833		0.688312	4.44072	0.169811		0.136986		0.313433	2.02215	0.75	4.83871	0.125		0.258621		0.0853659		0.264368	1.7056	0.2		0.0943396		0.447368	2.88625
MidTrunk/AboveYolk:	0.08	0.184211		0.0943396		0.108696		0.0930233		0.0819672		0.253731	3.17164	0.153846		0		0.116883		0.0377358		0.0958904		0.119403		1	12.5	0.104167		0.0172414		0.329268	4.11585	0.0229885		0		1	12.5	0.157895
Muscle:	0.18	0.644737	3.58187	0.150943		0.0869565		0.348837		0.0983607		0.179104		0.512821	2.849	0.6875	3.81944	0.506494	2.81385	0.150943		0.561644	3.12024	0.208955		1	5.55556	0.229167		0.103448		0.682927	3.79404	0.045977		0.2		1	5.55556	0.210526
TailRegion:	0.124	0.368421	2.97114	0.188679		0		0.116279		0.0819672		0.268657		0.205128		0.166667		0.753247	6.07457	0.113208		0.191781		0.328358	2.64805	1	8.06452	0.125		0		0.439024	3.54052	0.0574713		0		1	8.06452	0.184211
p-values prop.test
Forebrain:		0.001192		0.1289		0.0003016		0.5		3.99e-05		4.553e-05		5.479e-08		0.3693		1		0.5113		9.74e-06		0.0002258		2.371e-08		0.0003085		0.127		8.408e-06		5.612e-07		0.2302		2.2e-16		7.157e-06
Midbrain/Hindbrain:		0.004221		0.9147		0.5085		0.05191		0.996		0.03182		0.9983		0.9546		0.9629		0.002586		0.8118		3.947e-08		1.127e-09		1.861e-07		9.702e-05		0.5105		0.9604		0.5		2.2e-16		0.01566
Eye:		0.002566		0.2941		0.9525		0.0003467		0.9732		0.01153		0.9089		0.5		0.5		0.2014		0.6431		3.195e-12		1.42e-11		0.1207		0.5902		0.9983		0.9528		0.01082		2.2e-16		0.0004817
Ear/AboveHeart:		0.3511		0.8445		0.9264		0.5		0.5849		0.257		0.0001984		0.8127		0.8509		0.5		0.9244		0.0001241		2.2e-16		0.5		0.9547		2.2e-16		0.985		0.3429		2.2e-16		0.8967
Heart:		0.998		0.8595		0.09495		1		0.9997		0.9993		0.966		0.9969		0.9997		0.9848		1		0.9964		5.433e-06		0.9999		5.058e-10		0.5939		5.928e-15		0.989		1		0.6733
Notochord:		0.1638		5.138e-10		0.5		0.0008748		0.9048		0.02697		0.8627		0.7732		0.9851		0.5		0.01129		0.3441		5.34e-10		0.7732		0.7022		0.4049		0.993		0.2492		2.2e-16		0.05567
Yolk/YolkExtension:		5.196e-07		0.2512		0.9084		0.0005842		4.345e-13		0.002862		0.5694		0.05385		4.2e-16		0.4863		0.5658		0.00571		4.208e-09		0.6128		0.06077		0.9071		0.02828		0.4666		0.8107		8.915e-05
MidTrunk/AboveYolk:		0.01697		0.4904		0.3834		0.5		0.5		0.0004751		0.1373		0.9547		0.2542		0.7745		0.4477		0.252		2.2e-16		0.4151		0.9165		9.83e-07		0.9384		0.7348		2.2e-16		0.1253
Muscle:		1.744e-12		0.6094		0.9022		0.01459		0.9008		0.5		1.839e-05		2.444e-11		2.088e-07		0.6094		4.435e-09		0.3741		2.826e-14		0.2915		0.8764		1.184e-14		0.9972		0.5		2.2e-16		0.4202
TailRegion:		1.377e-05		0.1725		0.9872		0.5		0.7426		0.006743		0.147		0.3028		2.2e-16		0.5		0.1233		0.0002968		2.2e-16		0.5		0.9946		4.426e-08		0.9258		0.8472		2.2e-16		0.2395
p-values average 3 runs of wilcox.test
Forebrain:		0.0215467		0.196443		0.0216343		0.567967		0.00583533		0.0175747		0.005298		0.503833		0.995867		0.5677		0.00583533		0.013197		0.003747		0.005298		0.181933		0.005298		0.005298		0.271533		0.003747		0.0108077
Midbrain/Hindbrain:		0.0203027		0.949667		0.287133		0.137133		0.994633		0.0860167		0.996133		0.9711		0.976433		0.02521		0.854567		0.00454733		0.00481133		0.00592		0.0119877		0.6205		0.9722		0.466033		0.003713		0.0314833
Eye:		0.0232917		0.2282		0.961267		0.046002		0.982967		0.0112783		0.957233		0.7784		0.582567		0.135143		0.711267		0.00579133		0.005331		0.202293		0.736667		0.996167		0.958467		0.005132		0.003645		0.0367213
Ear/AboveHeart:		0.137467		0.9744		0.9966		0.7036		0.792133		0.1782		0.028692		0.952533		0.9329		0.7996		0.977533		0.00977667		0.004734		0.391067		0.9966		0.00553867		0.9966		0.701467		0.003645		0.9966
Heart:		0.993533		0.9047		0.259033		0.998133		0.9969		0.991667		0.975767		0.995033		0.995633		0.974133		0.996833		0.993633		0.00545533		0.997167		0.00521233		0.669433		0.005298		0.998133		0.998133		0.820433
Notochord:		0.154467		0.00583533		0.8121		0.00570933		0.984133		0.0268537		0.984667		0.838733		0.995333		0.645667		0.0210067		0.470967		0.005257		0.812333		0.797933		0.4639		0.9915		0.245623		0.00354567		0.0786967
Yolk/YolkExtension:		0.00579367		0.28008		0.604633		0.027591		0.005666		0.026361		0.7832		0.106007		0.00570767		0.5275		0.733467		0.0131077		0.00566633		0.7005		0.0349733		0.959567		0.0466933		0.604167		0.8949		0.028756
MidTrunk/AboveYolk:		0.067544		0.527733		0.942433		0.58		0.368063		0.014538		0.201367		0.9966		0.232667		0.8732		0.2211		0.202233		0.00357967		0.4648		0.976433		0.00773467		0.972433		0.9966		0.00357967		0.152367
Muscle:		0.00512733		0.751267		0.9981		0.0524067		0.924233		0.678467		0.0204693		0.00512733		0.005255		0.765267		0.00679733		0.4216		0.003747		0.315867		0.928		0.00517033		0.9934		0.758467		0.003747		0.328533
TailRegion:		0.00570667		0.419067		0.998233		0.541867		0.885267		0.0731267		0.16813		0.22048		0.00575067		0.790433		0.07302		0.0314503		0.003512		0.4761		0.998233		0.00574967		0.952367		0.998233		0.003512		0.525867
Notes:
the p-values from a proportions test against control plasmid expression and the average p-values of three replicates of a wilcoxon test were used to assess significant anatomies.
raw expression proportion: the percent of scored embryos expressing in an anatomy
p-values prop.test: p-values obtained from comparing the number of embryos expressing an anatomy in the control plasmid to that of the experimental plasmid.
wilcoxon.test: p-values obtained fromshuffling and randomly partitioning the data into three sets and using the average expression from each anatomy in a non-parametric test against the shuffled and partitioned control plasmid expression
red coloring indicates where p-values are <= .05
for each CCE anatomy we used the rule that both the proportions test and the wilcoxon test had to have a p <= .05 to consider the anatomy significant
yellow fill indicates the raw proportion of embryos with expression for anatomies we called significant when applying the above rule.
green fill is the result of dividing the proportion of embryos with CCE expression by that of the control plasmid expression, on a per anatomy basis.
