# Supplementary material for: Transcriptional Enhancers in Protein-Coding Exons of Vertebrate Developmental Genes
Source: PLoS One. 2012 May 2;7(5):e35202. doi: 10.1371/journal.pone.0035202 (PMC3342275; doi:10.1371/journal.pone.0035202)
Supplement: Data File S3 — Data file of CCE activity patterns. CCE_HostGeneComparison tab: lists the CCE, the anatomies of experimental GFP expression, the ZFIN ID of the CCE-containing gene, the anatomies of gene expression in ZFIN database. Expression information for the closest upstream and downstream gene is also listed. RandomlyAssignedGenes tab: Counts of matching expression for 100 sets of 20 randomly assigned genes. CCE_GENE_UPSTREAM_DOWNSTREAM tab: ZFINID and common gene name for the CCE-containing gene, and the closest upstream and downstream genes. ExtendedAnatomy tab: Relational anatomy tags from the ZFIN database assigned to the anatomy tags used to visually score GFP in zebrafish embryos. (XLS) [file pone.0035202.s016.xls]

## Sheet: CCE_HostGeneComparison
Plasmid Name	CCE-name	Number of Anatomies CCE Expresses Using Extended Anatomy Terms (Anatomical Term Corresponding to Anatomy Area, and 1 level Down in Anatomy Subtree)	Name of Anatomies CCE Expresses	Name of CCE Containing Gene	Zfin ID Containing Gene	Number of anatomies Containing Gene Expresses 22-30 hpf	Name of Anatomies Containing Gene Expresses 22-30 hpf	Number of Shared Anatomies between Containing Gene Expression and CCE Expression	Name of Shared Anatomies Between CCE Expression and Containing Gene Expression	Upstream Gene Name	UpstreamGene ZfinID	Number of Anatomies In which Upstream Gene Expresses 22-30 hpf	Name of Anatomies in which Upstream Gene Expresses 22-30 hpf	Number of Anatomies Shared Between Upstream Gene Expression 22-30 hpf and CCE Expression	Name of Anatomies Shared Between Upstream Gene Expression 22-30 hpf and CCE Expression	Downstream Gene Name	Downstream Gene Zfin ID	Number of Anatomies In which Downstream Gene Expresses 22-30 hpf	Name of Anatomies in which Downstream Gene Expresses 22-30 hpf	Number of Anatomies Shared Between Downstream Gene Expression Before 22-30 hpf and CCE Expression	Name of Anatomies Shared Between Downstream Gene Expression Before 22-30 hpf and CCE Expression
Plasmid 2	CCE-ephb3a(formerly:ek3)	62	ball, telencephalon, YSL, tegmentum, infracarinalis, supracarinalis, epaxialis, hypaxialis, optic tectum, myotome, chordo neural hinge, post-vent region, anal fin, iris, forebrain ventricle, hindbrain nucleus, annular ligament, MeL, MeLc, Kupffer s vesicle, cerebellum, extension, forebrain, midbrain, retina, superficial lateralis, torus longitudinalis, trunk musculature, torus semicircularis, rho…	ephb3a	ZDB-GENE-990415-60	13	epiphysis, hindbrain, hypothalamus, optic vesicle, pharyngeal arch 3-7 skeleton, cerebellum, eye, forebrain, midbrain, tegmentum, optic tectum, myotome, immature eye,	Shared 8	hindbrain, cerebellum, eye, forebrain, midbrain, tegmentum, optic tectum, myotome,	UPSTREAMGENE pls1	ZDB-GENE-030131-6205	5	macrophage, lens, otic vesicle, pronephric duct, lens vesicle,	SharedUP 1	lens,	DOWNSTREAM GENE kcnmb2	ZDB-GENE-050320-97	0		SharedDown 0
Plasmid 5	CCE-rab11fip4a	2	notochord, notochord posterior region,	rab11fip4a	ZDB-GENE-040718-266	13	central nervous system, telencephalon, eye, immature eye, hypothalamus, retinal neural layer, optic vesicle, otic vesicle, diencephalon, forebrain, midbrain, neural tube, optic cup,	Shared 0		UPSTREAMGENE gli2b	ZDB-GENE-050523-1	7	hindbrain, cerebellum, optic tectum, dorsal thalamus, telencephalic ventricle, ventricular zone, pars intermedia,	SharedUP 0		DOWNSTREAM GENE cry3	ZDB-GENE-010426-6	1	unspecified,	SharedDown 0
Plasmid 7	CCE-prim1	6	telencephalon, forebrain ventricle, forebrain, diencephalon, telencephalon diencephalon boundary, eminentia thalami,	prim1	ZDB-GENE-990603-6	12	blood, central nervous system, hindbrain, intermediate cell mass of mesoderm, pharyngeal arch 3-7 skeleton, forebrain, retina, optic tectum, pectoral fin musculature, ventricular zone, eye, head,	Shared 1	forebrain,	UPSTREAMGENE rnd1	ZDB-GENE-040630-6	6	brain, optic vesicle, otic vesicle, spinal cord, optic stalk, neuron,	SharedUP 0		DOWNSTREAM GENE tfip11	ZDB-GENE-040718-479	1	unspecified,	SharedDown 0
Plasmid 9	CCE-abca1a	17	ball, YSL, iris, annular ligament, extension, retina, pupil, corneal primordium, optic furrow, lens, yolk, eye, notochord, cornea, ciliary body, notochord posterior region, optic choroid,	abca1a	ZDB-GENE-031006-12	11	artery, central nervous system, epiphysis, hindbrain, telencephalon, vein, diencephalon, midbrain, tegmentum, basal plate midbrain region, neuron,	Shared 0		UPSTREAMGENE acy3.1	ZDB-GENE-040718-345	0		SharedUP 0		DOWNSTREAM GENE aptx	ZDB-GENE-040628-2	0		SharedDown 0
Plasmid 16	CCE-slc1a2	10	ball, telencephalon, YSL, forebrain ventricle, extension, forebrain, yolk, diencephalon, telencephalon diencephalon boundary, eminentia thalami,	slc1a2b	ZDB-GENE-030131-7779	3	hindbrain, forebrain, neuron,	Shared 1	forebrain,	UPSTREAMGENE trim44	ZDB-GENE-050522-37	1	whole organism,	SharedUP 0		DOWNSTREAM GENE pdhx	ZDB-GENE-040426-1539	1	whole organism,	SharedDown 0
Plasmid 17	CCE-f2	27	ball, telencephalon, YSL, precaudal vertebra, iris, forebrain ventricle, annular ligament, extension, forebrain, retina, somite, trunk, pupil, coelom, corneal primordium, optic furrow, lens, yolk, diencephalon, eye, notochord, cornea, ciliary body, telencephalon diencephalon boundary, eminentia thalami, notochord posterior region, optic choroid,	f2	ZDB-GENE-030131-4606	1	YSL,	Shared 1	YSL,	UPSTREAMGENE syt13	ZDB-GENE-050417-135	6	cranial ganglion, hindbrain, spinal cord, midbrain, trigeminal ganglion, neuron,	SharedUP 0		DOWNSTREAM GENE arhgap1	ZDB-GENE-050417-305	2	central nervous system, epiphysis,	SharedDown 0
Plasmid 18	CCE-odz3	19	telencephalon, infracarinalis, supracarinalis, epaxialis, hypaxialis, myotome, forebrain ventricle, forebrain, superficial lateralis, trunk musculature, immature macula, otolith, pericardial muscle, otic vesicle protrusion, otic vesicle, diencephalon, musculature system, telencephalon diencephalon boundary, eminentia thalami,	odz3	ZDB-GENE-990714-19	16	forebrain, midbrain, pectoral fin bud, somite, spinal cord, telencephalon, pharyngeal arch 3-7 skeleton, diencephalon, liver, tegmentum, optic tectum, pectoral fin musculature, basal plate midbrain region, neural tube, alar plate midbrain region, brain,	Shared 3	forebrain, telencephalon, diencephalon,	UPSTREAMGENE zgc:153720	ZDB-GENE-060929-982	0		SharedUP 0		DOWNSTREAM GENE dctd	ZDB-GENE-050417-116	1	whole organism,	SharedDown 0
Plasmid 19	CCE-rfx2	9	infracarinalis, supracarinalis, epaxialis, hypaxialis, myotome, superficial lateralis, trunk musculature, pericardial muscle, musculature system,	rfx2	ZDB-GENE-050227-4	14	central nervous system, floor plate, hindbrain, olfactory placode, spinal cord, telencephalon, diencephalon, forebrain, midbrain, pronephric duct, tegmentum, neural tube, pronephros, intermediate mesoderm,	Shared 0		UPSTREAMGENE acsbg2	ZDB-GENE-030131-7099	11	hindbrain, peripheral olfactory organ, olfactory placode, optic vesicle, spinal cord, telencephalon, diencephalon, retina, tegmentum, basal plate midbrain region, neural tube,	SharedUP 0		DOWNSTREAM GENE foxd1	ZDB-GENE-980605-6	0		SharedDown 0
Plasmid 20	CCE-rab11fip4a	19	ball, YSL, infracarinalis, supracarinalis, epaxialis, hypaxialis, myotome, chordo neural hinge, post-vent region, anal fin, Kupffer s vesicle, extension, superficial lateralis, trunk musculature, pericardial muscle, tail bud, yolk, musculature system, caudal fin,	rab11fip4a	ZDB-GENE-040718-266	13	central nervous system, telencephalon, eye, immature eye, hypothalamus, retinal neural layer, optic vesicle, otic vesicle, diencephalon, forebrain, midbrain, neural tube, optic cup,	Shared 0		UPSTREAMGENE gli2b	ZDB-GENE-050523-1	7	hindbrain, cerebellum, optic tectum, dorsal thalamus, telencephalic ventricle, ventricular zone, pars intermedia,	SharedUP 0		DOWNSTREAM GENE cry3	ZDB-GENE-010426-6	1	unspecified,	SharedDown 0
Plasmid A	CCE-bysl	26	tegmentum, optic tectum, hindbrain nucleus, MeL, MeLc, cerebellum, midbrain, torus longitudinalis, torus semicircularis, rhombomere, ventro-caudal cluster, rhombic lip, hindbrain interneuron, MeM, MeLm, hindbrain, fourth ventricle, tectal ventricle, medulla oblongata, lateral wall midbrain, floor plate rhombomere region, statoacoustic (VIII) nucleus, midbrain nucleus, hindbrain commissure, MeLr, …	bysl	ZDB-GENE-040426-1287	10	pharyngeal arch 3-7 skeleton, forebrain, pectoral fin bud, retina, optic tectum, pectoral fin musculature, myotome, ventricular zone, alar plate midbrain region, immature eye,	Shared 1	optic tectum,	UPSTREAMGENE med20	ZDB-GENE-040801-104	1	unspecified,	SharedUP 0		DOWNSTREAM GENE zgc:103502	ZDB-GENE-041010-110	1	whole organism,	SharedDown 0
Plasmid B	CCE-pax2a	17	telencephalon, infracarinalis, supracarinalis, epaxialis, hypaxialis, myotome, forebrain ventricle, forebrain, superficial lateralis, trunk musculature, pericardial muscle, diencephalon, notochord, musculature system, telencephalon diencephalon boundary, eminentia thalami, notochord posterior region,	pax2a	ZDB-GENE-990415-8	42	midbrain hindbrain boundary, otic vesicle, optic stalk, pronephric duct, presumptive neural retina, unspecified, epibranchial placode, glossopharyngeal ganglion, vagal ganglion 1, vagal ganglion 2, vagal ganglion 3, vagal ganglion 4, pronephric tubule, neuroblast, hindbrain, mesoderm, proctodeum, spinal cord, pharyngeal arch 3-7 skeleton, neural tube, neuron, retina, pronephric proximal convolute…	Shared 1	forebrain,	UPSTREAMGENE cdhr1	ZDB-GENE-040924-4	0		SharedUP 0		DOWNSTREAM GENE cuedc2	ZDB-GENE-030131-6283	1	unspecified,	SharedDown 0
Plasmid D	CCE-fez1	57	ball, telencephalon, YSL, tegmentum, optic tectum, chordo neural hinge, post-vent region, anal fin, iris, forebrain ventricle, hindbrain nucleus, annular ligament, MeL, MeLc, Kupffer s vesicle, cerebellum, extension, forebrain, midbrain, retina, torus longitudinalis, torus semicircularis, rhombomere, immature macula, pupil, ventro-caudal cluster, rhombic lip, otolith, corneal primordium, otic ves…	fez1	ZDB-GENE-040426-2723	6	cranial ganglion, epiphysis, hindbrain, telencephalon, forebrain, neuron,	Shared 3	hindbrain, telencephalon, forebrain,	UPSTREAMGENE vps26b	ZDB-GENE-040426-2699	1	unspecified,	SharedUP 0		DOWNSTREAM GENE esama	ZDB-GENE-090629-1	13	cardiovascular system, heart rudiment, heart tube, dorsal aorta, posterior cardinal vein, axial vasculature, post-vent region, cranial vasculature, intersegmental vessel, atrial endocardium, ventricular endocardium, aortic arch, blood vessel endothelial cell,	SharedDown 1	post-vent region,
Plasmid J	CCE-lmo1	91	ball, cardiac ventricle, telencephalon, YSL, heart, sinus venosus, tegmentum, infracarinalis, precaudal vertebra, supracarinalis, epaxialis, hypaxialis, optic tectum, myotome, chordo neural hinge, post-vent region, anal fin, iris, forebrain ventricle, atrioventricular canal, myocardium, heart valve, hindbrain nucleus, annular ligament, presumptive atrioventricular canal, MeL, MeLc, Kupffer s vesi…	lmo1	ZDB-GENE-021115-6	9	hindbrain, hypothalamus, spinal cord, telencephalon, diencephalon, retina, tegmentum, basal plate midbrain region, neural tube,	Shared 5	hindbrain, telencephalon, diencephalon, retina, tegmentum,	UPSTREAMGENE stk33	ZDB-GENE-040724-242	0		SharedUP 0		DOWNSTREAM GENE rras2	ZDB-GENE-050417-352	5	head mesenchyme, somite, myotome, muscle pioneer, pharyngeal arch,	SharedDown 2	somite, myotome,
Plasmid K	CCE-ddx18	32	telencephalon, tegmentum, optic tectum, forebrain ventricle, hindbrain nucleus, MeL, MeLc, cerebellum, forebrain, midbrain, torus longitudinalis, torus semicircularis, rhombomere, ventro-caudal cluster, rhombic lip, hindbrain interneuron, MeM, MeLm, hindbrain, diencephalon, fourth ventricle, tectal ventricle, medulla oblongata, lateral wall midbrain, floor plate rhombomere region, telencephalon d…	ddx18	ZDB-GENE-030131-9685	11	pharyngeal arch 3-7 skeleton, cerebellum, eye, forebrain, liver, midbrain, retina, optic tectum, pectoral fin musculature, alar plate midbrain region, immature eye,	Shared 4	cerebellum, forebrain, midbrain, optic tectum,	UPSTREAMGENE tfcp2l1	ZDB-GENE-040704-58	1	hypophysis,	SharedUP 0		DOWNSTREAM GENE ccdc93	ZDB-GENE-060421-8315	0		SharedDown 0
Plasmid M	CCE-isl1	45	cardiac ventricle, heart, sinus venosus, tegmentum, optic tectum, atrioventricular canal, myocardium, heart valve, hindbrain nucleus, presumptive atrioventricular canal, MeL, MeLc, cerebellum, midbrain, bulbus arteriosus, torus longitudinalis, torus semicircularis, rhombomere, endocardium, epicardium, ventro-caudal cluster, rhombic lip, presumptive bulbus arteriosus, presumptive atrium heart tube…	isl1	ZDB-GENE-980526-112	38	trigeminal ganglion, trunk, posterior pancreatic bud, pancreatic bud, posterior lateral plate mesoderm, Rohon-Beard neuron, primary motor neuron, epiphysis, retinal ganglion cell layer, hindbrain, hypothalamus, optic vesicle, spinal cord, telencephalon, diencephalon, forebrain, liver, retina, pancreas primordium, neural tube, pharyngeal arch, neuron, unspecified, central nervous system, facial ne…	Shared 1	hindbrain,	UPSTREAMGENE zgc:152897	ZDB-GENE-060929-432	0		SharedUP 0		DOWNSTREAM GENE fsta	ZDB-GENE-990714-11	18	central nervous system, hindbrain, optic vesicle, spinal cord, pharyngeal arch 3-7 skeleton, cerebellum, diencephalon, head mesenchyme, midbrain, optic stalk, retina, somite, optic tectum, neural tube, alar plate midbrain region, otic vesicle, epiphysis, unspecified,	SharedDown 4	hindbrain, cerebellum, midbrain, optic tectum,
Plasmid N	CCE-lmo1	29	telencephalon, infracarinalis, precaudal vertebra, supracarinalis, epaxialis, hypaxialis, myotome, chordo neural hinge, post-vent region, anal fin, forebrain ventricle, Kupffer s vesicle, forebrain, somite, superficial lateralis, trunk musculature, immature macula, trunk, coelom, otolith, pericardial muscle, otic vesicle protrusion, otic vesicle, tail bud, diencephalon, musculature system, caudal…	lmo1	ZDB-GENE-021115-6	9	hindbrain, hypothalamus, spinal cord, telencephalon, diencephalon, retina, tegmentum, basal plate midbrain region, neural tube,	Shared 2	telencephalon, diencephalon,	UPSTREAMGENE stk33	ZDB-GENE-040724-242	0		SharedUP 0		DOWNSTREAM GENE rras2	ZDB-GENE-050417-352	5	head mesenchyme, somite, myotome, muscle pioneer, pharyngeal arch,	SharedDown 2	somite, myotome,
Plasmid 42	CCE-gria3b (UCR)	29	ball, cardiac ventricle, telencephalon, YSL, heart, sinus venosus, forebrain ventricle, atrioventricular canal, myocardium, heart valve, presumptive atrioventricular canal, extension, forebrain, bulbus arteriosus, endocardium, epicardium, presumptive bulbus arteriosus, presumptive atrium heart tube, presumptive endocardium, yolk, diencephalon, heart tube, atrium, endocardial cushion, telencephalo…	gria3b	ZDB-GENE-030616-53	7	central nervous system, cranial ganglion, hindbrain, spinal cord, whole organism, dorso-rostral cluster, ventro-rostral cluster,	Shared 0		UPSTREAMGENE pls3	ZDB-GENE-040718-10	0		SharedUP 0		DOWNSTREAM GENE thoc2	ZDB-GENE-030616-54	0		SharedDown 0
Plasmid 47	CCE-hoxa5a (UCR)	11	iris, annular ligament, retina, pupil, corneal primordium, optic furrow, lens, eye, cornea, ciliary body, optic choroid,	hoxa5a	ZDB-GENE-000823-9	5	spinal cord, pectoral fin bud, neural tube, pectoral fin, pharyngeal arch,	Shared 0		UPSTREAMGENE hoxa9a	ZDB-GENE-000823-1	4	spinal cord, neural tube, pectoral fin bud, myoblast,	SharedUP 0		DOWNSTREAM GENE hoxa4a	ZDB-GENE-000823-4	5	spinal cord, pharyngeal arch 3-7 skeleton, pancreas primordium, neural tube, pancreatic bud,	SharedDown 0
Plasmid 49	CCE-sfrs3b (UCR)	68	telencephalon, tegmentum, infracarinalis, precaudal vertebra, supracarinalis, epaxialis, hypaxialis, optic tectum, myotome, chordo neural hinge, post-vent region, anal fin, iris, forebrain ventricle, hindbrain nucleus, annular ligament, MeL, MeLc, Kupffer s vesicle, cerebellum, forebrain, midbrain, retina, somite, superficial lateralis, torus longitudinalis, trunk musculature, torus semicirculari…	sfrs3b	ZDB-GENE-071005-2	1	unspecified,	Shared 0		UPSTREAMGENE apobec2a	ZDB-GENE-050306-15	6	myotome, skeletal muscle, cardiac muscle, heart rudiment, primitive heart tube, heart tube,	SharedUP 1	myotome,	DOWNSTREAM GENE tmcc2	NO_ZFINID	0		SharedDown 0
Plasmid 51	CCE-ddx5 (UCR)	47	ball, telencephalon, YSL, tegmentum, optic tectum, iris, forebrain ventricle, hindbrain nucleus, annular ligament, MeL, MeLc, cerebellum, extension, forebrain, midbrain, retina, torus longitudinalis, torus semicircularis, rhombomere, pupil, ventro-caudal cluster, rhombic lip, corneal primordium, hindbrain interneuron, MeM, MeLm, optic furrow, hindbrain, lens, yolk, diencephalon, eye, fourth ventr…	ddx5	ZDB-GENE-030131-925	1	unspecified,	Shared 0		UPSTREAMGENE smurf2	ZDB-GENE-030131-1830	0		SharedUP 0		DOWNSTREAM GENE mgat3	ZDB-GENE-050522-249	0		SharedDown 0
							Total:	12						2						4
For each CCE, a list of anatomies was obtained allowing 1 level down in the anatomical hierarchy
on Zfin. The significant anatomies in which the CCE expressed were compared to host, upstream
and downstream genes expressing within 22-30 hours post fertilization

## Sheet: RandomlyAssignedGenes
20 CCEs were randomly assigned host genes, and the number of CCEs sharing anatomies with
the random host gene was counted. This was repeated 100 times.
Groups of 20 CCEs with Randomly Assigned Host Genes	#CCE out of 20 with at least 1 anatomy shared with randomly assigned host gene
1	3
2	2
3	2
4	5
5	2
6	3
7	3
8	1
9	5
10	3
11	4
12	2
13	2
14	4
15	5
16	2
17	4
18	3
19	4
20	4
21	2
22	4
23	5
24	7
25	2
26	4
27	4
28	1
29	1
30	6
31	0
32	1
33	3
34	3
35	3
36	7
37	4
38	5
39	2
40	8
41	2
42	4
43	4
44	7
45	5
46	4
47	6
48	0
49	6
50	4
51	1
52	3
53	4
54	2
55	5
56	4
57	5
58	3
59	6
60	4
61	7
62	4
63	4
64	4
65	2
66	4
67	2
68	3
69	5
70	3
71	2
72	1
73	7
74	4
75	4
76	3
77	1
78	3
79	1
80	6
81	3
82	5
83	6
84	4
85	4
86	3
87	1
88	2
89	1
90	3
91	2
92	5
93	6
94	4
95	3
96	3
97	6
98	7
99	1
100	5
AVERAGE	3.58
STDEV	1.77

## Sheet: CCE_GENE_UPSTREAM_DOWNSTREAM
CCE ID	Containing Gene	ZfinID_Containing GENE	UpStreamGene	ZfinID_UpStreamGene	DownStreamGene	ZfinID_DownStreamGene
18	odz3	ZDB-GENE-990714-19	zgc:153720	ZDB-GENE-060929-982	dctd	ZDB-GENE-050417-116
9	abca1a	ZDB-GENE-031006-12	acy3.1	ZDB-GENE-040718-345	aptx	ZDB-GENE-040628-2
2	ephb3a	ZDB-GENE-990415-60	pls1	ZDB-GENE-030131-6205	kcnmb2	ZDB-GENE-050320-97
L	rab40c	ZDB-GENE-030515-1	pigq	ZDB-GENE-030131-9793	xylt1	NO_ZFINID
51	ddx5	ZDB-GENE-030131-925	smurf2	ZDB-GENE-030131-1830	mgat3	ZDB-GENE-050522-249
M	isl1	ZDB-GENE-980526-112	zgc:152897	ZDB-GENE-060929-432	fsta	ZDB-GENE-990714-11
C	foxp1b	ZDB-GENE-041203-1	gpr27	ZDB-GENE-071022-3	zgc:113054	ZDB-GENE-050320-9
14	ETV5B	ZDB-GENE-991228-4	cacnb4b	ZDB-GENE-060421-7907	zgc:92027	ZDB-GENE-040930-3
N	lmo1	ZDB-GENE-021115-6	stk33	ZDB-GENE-040724-242	rras2	ZDB-GENE-050417-352
17	f2	ZDB-GENE-030131-4606	syt13	ZDB-GENE-050417-135	arhgap1	ZDB-GENE-050417-305
J	lmo1	ZDB-GENE-021115-6	stk33	ZDB-GENE-040724-242	rras2	ZDB-GENE-050417-352
19	rfx2	ZDB-GENE-050227-4	acsbg2	ZDB-GENE-030131-7099	foxd1	ZDB-GENE-980605-6
K	ddx18	ZDB-GENE-030131-9685	tfcp2l1	ZDB-GENE-040704-58	ccdc93	ZDB-GENE-060421-8315
E	dlx2a	ZDB-GENE-980526-212	itga6	ZDB-GENE-050309-23	dync1i2a	ZDB-GENE-060929-1086
D	fez1	ZDB-GENE-040426-2723	vps26b	ZDB-GENE-040426-2699	esama	ZDB-GENE-090629-1
44	dlg2	ZDB-GENE-050221-3	tmem126a	ZDB-GENE-040426-1770	hyou1	ZDB-GENE-030131-5344
F	ipo9	ZDB-GENE-040426-2953	kdm5ba	ZDB-GENE-030131-5379	shisa4	ZDB-GENE-050417-419
11	zgc:103663	ZDB-GENE-041114-57	zgc:175146	ZDB-GENE-080516-6	dusp7	ZDB-GENE-030131-5457
8	hif1an	ZDB-GENE-030826-19	wnt8b	ZDB-GENE-990415-279	cuedc2	ZDB-GENE-030131-6283
B	pax2a	ZDB-GENE-990415-8	cdhr1	ZDB-GENE-040924-4	cuedc2	ZDB-GENE-030131-6283
1	msh6	ZDB-GENE-020905-3	zgc:92420	ZDB-GENE-040801-200	fbxo11	ZDB-GENE-061103-70
42	gria3b	ZDB-GENE-030616-53	pls3	ZDB-GENE-040718-10	thoc2	ZDB-GENE-030616-54
39	nrxn3a	ZDB-GENE-070206-9	jkamp	ZDB-GENE-040718-382	dio2	ZDB-GENE-030327-4
47	hoxa5a	ZDB-GENE-000823-9	hoxa9a	ZDB-GENE-000823-1	hoxa4a	ZDB-GENE-000823-4
A	bysl	ZDB-GENE-040426-1287	med20	ZDB-GENE-040801-104	zgc:103502	ZDB-GENE-041010-110
6	ell	ZDB-GENE-030131-3946	fkbp8	ZDB-GENE-040426-1849	amh	ZDB-GENE-050706-192
49	sfrs3b	ZDB-GENE-071005-2	apobec2a	ZDB-GENE-050306-15	tmcc2	NO_ZFINID
7	prim1	ZDB-GENE-990603-6	rnd1	ZDB-GENE-040630-6	tfip11	ZDB-GENE-040718-479
16	slc1a2b	ZDB-GENE-030131-7779	trim44	ZDB-GENE-050522-37	pdhx	ZDB-GENE-040426-1539
20	rab11fip4a	ZDB-GENE-040718-266	gli2b	ZDB-GENE-050523-1	cry3	ZDB-GENE-010426-6
12	gpia	ZDB-GENE-020513-2	lsm14aa	ZDB-GENE-040426-1567	hsd17b2	ZDB-GENE-040928-1
5	rab11fip4a	ZDB-GENE-040718-266	gli2b	ZDB-GENE-050523-1	cry3	ZDB-GENE-010426-6
The host, closest upstream and downstream gene used for this analysis

## Sheet: ExtendedAnatomy
0	Forebrain	ZFA:0000109	ZFA:0001343	ZFA:0007010	ZFA:0000101	ZFA:0001259	ZFA:0000079
1	Midbrain/Hindbrain	ZFA:0000029	ZFA:0000128	ZFA:0001638	ZFA:0000159	ZFA:0000445	ZFA:0007003	ZFA:0000545	ZFA:0000599	ZFA:0005209	ZFA:0005214	ZFA:0001658	ZFA:0000110	ZFA:0001440	ZFA:0005211	ZFA:0001258	ZFA:0001064	ZFA:0001692	ZFA:0005216	ZFA:0000160	ZFA:0005212	ZFA:0001665	ZFA:0005213	ZFA:0005215	ZFA:0000449	ZFA:0000100	ZFA:0000906
2	Eye	ZFA:0000107	ZFA:0001676	ZFA:0000640	ZFA:0005491	ZFA:0000035	ZFA:0001688	ZFA:0001203	ZFA:0001283	ZFA:0000152	ZFA:0005229	ZFA:0001238
3	Ear	ZFA:0000051	ZFA:0001715	ZFA:0001095	ZFA:0001617
4	HeartTube/AboveHeart	ZFA:0000114	ZFA:0000360	ZFA:0001722	ZFA:0001317	ZFA:0000009	ZFA:0000471	ZFA:0000154	ZFA:0001724	ZFA:0001319	ZFA:0001320	ZFA:0001719	ZFA:0001712	ZFA:0005065	ZFA:0000173	ZFA:0001718	ZFA:0001723	ZFA:0005057	ZFA:0005063	ZFA:0001315
5	Notochord	ZFA:0000135	ZFA:0001670
6	Yolk	ZFA:0000084	ZFA:0000106	ZFA:0000006	ZFA:0000088
7	Mid-Trunk	ZFA:0001115	ZFA:0001438	ZFA:0000263	ZFA:0000155
8	Muscle	ZFA:0000548	ZFA:0000473	ZFA:0001056	ZFA:0000362	ZFA:0001653	ZFA:0000286	ZFA:0000216	ZFA:0000288	ZFA:0000349
9	Tail	ZFA:0000077	ZFA:0001117	ZFA:0001082	ZFA:0000001	ZFA:0001162	ZFA:0001058
The Zfin anatomy tags used for this analysis.
